# Supplementary material
Source: PubMed Central journal article supplement (PMC3241990)
Supplement: NIHMS338950-supplement-1_si_001.pdf [file NIHMS338950-supplement-1_si_001.pdf]

## Supporting Information

### Selective Molecular Sequestration with Concurrent Natural Product Functionalization and Derivatization: From Crude Natural Product Extracts to a Single Natural Product Derivative in One Step

Viktor Krchňák, Jaroslav Zajíček, Patricia A. Miller and Marvin J. Miller\*

Department of Chemistry and Biochemistry, 251 Nieuwland Science Hall, University of Notre  
Dame, Notre Dame, Indiana 46556, USA

mmiller1@nd.edu

#### Table of Contents

|                                                                                          |    |
|------------------------------------------------------------------------------------------|----|
| 1. General Information .....                                                             | S2 |
| 2. Types of peppercorn and amounts of materials extracted.....                           | S3 |
| 3. Microbiological assays .....                                                          | S4 |
| 4. <sup>1</sup> H and <sup>13</sup> C NMR tables, spectra and multidimensional NMR ..... | S6 |

## General Information

Commercially available ACS grade solvents were used without further purification. Peppercorns were purchased from Pepper-Passion Inc. (Issaquah, WA, [www.pepper-passion.com](http://www.pepper-passion.com)), Allspice, cloves and ground cloves were obtained from Martin's supermarket, South Bend, IN, USA. The Rink resin (100-200 mesh, 1% DVB, 0.75 mmol/g) and Wang resin (100-200 mesh, 1% DVB, 1.0 mmol/g) were from Advanced ChemTech (Louisville, KY, [www.peptide.com](http://www.peptide.com)), the hydroxymethyl resin (100-200 mesh, 1% DVB, 0.98 mmol/g) from NovaBiochem (San Diego, CA, [www.emdbiosciences.com/html/NBC/home.html](http://www.emdbiosciences.com/html/NBC/home.html)). Synthesis was carried out on Domino Blocks in disposable polypropylene reaction vessels. A Labquake Tube Rotator was used for gentle but efficient tumbling of resin slurry.

All NMR spectra were recorded using 600 MHz or 800 MHz spectrometers.  $^1\text{H}$  and  $^{13}\text{C}$  chemical shifts,  $\delta_{\text{H}}$  and  $\delta_{\text{C}}$ , are reported relative to the corresponding residual solvent signal ( $\text{CD}_3\text{OD}$   $\delta_{\text{H}}=3.31$  ppm,  $\delta_{\text{C}}=49.00$  ppm;  $\text{CD}_3\text{CN}$   $\delta_{\text{H}}=1.94$  ppm,  $\delta_{\text{C}}=1.39$  ppm ).

All reactions were carried out at ambient temperature ( $\sim 21$  °C) unless stated otherwise. The volume of wash solvent was 10 mL per 1 g of resin. For washing, resin slurry was shaken with the fresh solvent for at least 1 min before changing the solvent. After adding a reagent solution, the resin slurry was manually vigorously shaken to break any potential resin clumps. Resin-bound intermediates were dried by a stream of nitrogen for prolonged storage and/or quantitative analysis.

For the LC/MS analyses, a sample of resin ( $\sim 5$  mg) was treated with TFA in dichloromethane (DCM), the cleavage cocktail was evaporated by a stream of nitrogen, and cleaved compounds extracted into 0.5 mL of MeOH. Alternatively, a sample of resin-bound product on a silicon-based linker was cleaved by 0.1 M TBAF in THF for 30 min, the solution was diluted with MeOH and analyzed.

## Types of peppercorn and amounts of materials extracted.

**Table 1.** Total extracts and content of piperine and piperettine in peppercorns.

| Entry | Peppercorn                     | Total extract | piperine | piperettine |
|-------|--------------------------------|---------------|----------|-------------|
| 1     | Lampong Black                  | 292 mg        | 116 mg   | 19.7 mg     |
| 2     | Malabar Black                  | 241 mg        | 77 mg    | 14.5 mg     |
| 3     | Madagascar Black               | 248 mg        | 89 mg    | 16.6 mg     |
| 4     | Sarawak Black                  | 204 mg        | 61 mg    | 12.6 mg     |
| 5     | Tellicherry Black              | 248 mg        | 71 mg    | 14.8 mg     |
| 6     | Talamanca Del Caribe Black     | 252 mg        | 80 mg    | 8.7 mg      |
| 7     | Vietnamese Black               | 223 mg        | 63 mg    | 11.0 mg     |
| 8     | Pohnpei peppercorns            | 278 mg        | 82 mg    | 15.1 mg     |
| 9     | Muntok White                   | 213 mg        | 68 mg    | 12.3 mg     |
| 10    | Talamanca Del Caribe White     | 249 mg        | 87 mg    | 9.3 mg      |
| 11    | Sarawak Extra Fancy White      | 227 mg        | 60 mg    | 12.3 mg     |
| 12    | Freeze Dried Green peppercorns | 315 mg        | 68 mg    | 15.8 mg     |

**Table 2.** The effect of spice, its quantity and freshness on yield.

| Entry | Spice         | Quantity | Age                     | Yield |
|-------|---------------|----------|-------------------------|-------|
| 1     | Lampong Black | 50 mg    | freshly ground          | 2 %   |
| 2     | Lampong Black | 100 mg   | freshly ground          | 7 %   |
| 3     | Lampong Black | 200 mg   | freshly ground          | 19 %  |
| 4     | Lampong Black | 400 mg   | freshly ground          | 37 %  |
| 5     | Lampong Black | 800 mg   | freshly ground          | 46 %  |
| 6     | Lampong Black | 800 mg   | freshly ground          | 45 %  |
| 7     | Lampong Black | 800 mg   | 1 day old <sup>a</sup>  | 21 %  |
| 8     | Lampong Black | 800 mg   | 2 days old <sup>a</sup> | 20 %  |
| 9     | Lampong Black | 800 mg   | 2 days old <sup>a</sup> | 18 %  |
| 10    | Lampong Black | 800 mg   | 2 days old <sup>b</sup> | 36 %  |
| 11    | Lampong Black | 800 mg   | 4 days old <sup>a</sup> | 6 %   |

|    |               |        |                |      |
|----|---------------|--------|----------------|------|
| 12 | Allspice      | 800 mg | freshly ground | 20 % |
| 13 | cloves        | 800 mg | freshly ground | 69 % |
| 14 | ground cloves | 800 mg | freshly opened | 65 % |

Note: Yield was estimated from UV response on LC traces and calculated with respect to the initial resin loading; <sup>a</sup>exposed to open air; <sup>b</sup>in a sealed container

The LC/MS analyses were carried out using a 3 x 50 mm C18 reverse phase column. Mobile phases: 10 mM ammonium acetate in HPLC grade water (A) and HPLC grade acetonitrile (B). A gradient was formed from 5% to 80% of B in 10 min at 0.7 mL/min. The MS electrospray source operated at capillary voltage 3.5 kV and a desolvation temperature 300 °C.

Purification was carried out on a C18 column (19 x 100 mm, 5 µm particles). A solvent gradient was formed from 10 mM aqueous ammonium acetate and acetonitrile with a flow rate of 15 mL/min.

### General Procedure for Agar Diffusion Antibiotic Susceptibility Assay

Antibacterial activity of the compounds was determined by an agar diffusion assay.<sup>1</sup> All test organisms used in this study were from sources provided in **Table 3**. Overnight cultures of test organisms were grown in LB broth for 18-24 hours and standard suspensions of  $\sim 1.5 \times 10^6$  cfu/mL were prepared in sterile saline solution (0.9% NaCl) according to a BaSO<sub>4</sub> 0.5 McFarland Standard (bioMérieux, Inc).<sup>2,3</sup> This standardized suspension (0.1 mL) was added to 34 mL of sterile, melted, and tempered (47-50 °C) Mueller-Hinton No. 2 agar (HiMedia Laboratories). After gentle mixing, the inoculated melted agar was poured into a sterile petri dish (145 mm x 20 mm, Greiner Bio-One) and allowed to solidify. Wells of 9 mm diameter were cut from the petri dish agar and filled with 50 µL of the test sample solution. The petri dish was incubated at 37 °C for 18-24 hours and the inhibition zone diameters were measured (mm) with an electronic caliper after 24-48 hours. The results are summarized in **Table 4**.

**Table 3.** Test organisms used in this research.

| Strain                                                | Marker                                       | Origin/Reference                        |
|-------------------------------------------------------|----------------------------------------------|-----------------------------------------|
| <b>Gram-positive bacteria</b>                         |                                              |                                         |
| <i>Bacillus subtilis</i><br>ATCC 6633                 | Wild Type                                    | American Type Culture Collection        |
| <i>Staphylococcus aureus</i><br>SG511                 | Wild Type                                    | Hans Knöll Institute, Jena, Germany     |
| <i>Mycobacterium vaccae</i><br>IMET 10670             | Wild Type                                    | Hans Knöll Institute, Jena, Germany     |
| <i>Mycobacterium smegmatis</i><br>mc <sup>2</sup> 155 | Wild Type                                    | Snapper et al. <b>1990</b> <sup>4</sup> |
| <i>Micrococcus luteus</i><br>ATCC 10240               | Wild Type                                    | American Type Culture Collection        |
| <b>Gram-negative bacteria</b>                         |                                              |                                         |
| <i>Pseudomonas aeruginosa</i><br>KW799/WT             | Wild Type                                    | Zimmermann <b>1980</b> <sup>5</sup>     |
| <i>Pseudomonas aeruginosa</i><br>KW799/61             | Antibiotic Susceptible<br>Penetration Mutant | Zimmermann <b>1980</b> <sup>5</sup>     |
| <i>Escherichia coli</i><br>X580                       | β-Lactam Hypersensitive                      | Eli Lilly & Co.                         |

**Table 4.** Antibacterial activity of compounds in the agar diffusion assay

| compd <sup>a</sup> | Gram-positive bacteria          |                           |                             |                                |                                | Gram-negative bacteria           |         |                        |
|--------------------|---------------------------------|---------------------------|-----------------------------|--------------------------------|--------------------------------|----------------------------------|---------|------------------------|
|                    | <i>B. subtilis</i><br>6633 ATCC | <i>S. Aureus</i><br>SG511 | <i>M.smegmatis</i><br>MC155 | <i>M. vaccae</i><br>10670 IMET | <i>M. luteus</i><br>10240 ATCC | <i>P. aeruginosa</i><br>KW799/WT | K799/61 | <i>E. coli</i><br>X580 |
| <b>4</b>           | 14                              | 15                        | 15P <sup>c</sup>            | 15                             | 20                             | 12                               | 13      | 14                     |
| <b>12</b>          | 18p <sup>b</sup>                | 19P                       | 15ps                        | 19                             | 17                             | 11                               | 13      | 0                      |
| <b>13</b>          | 12/14p                          | 13/16P                    | 17s                         | 19                             | 21                             | 16                               | 18p     | 15                     |
| <b>16</b>          | 14P                             | 18P                       | 28s                         | 17                             | 26s                            | 11                               | 12      | 13P                    |
| <b>17</b>          | 0                               | 12                        | 15ps                        | 19                             | 38s                            | 15                               | 0       | 17                     |
| Cipro              | 26/30                           | -                         | 18/27P                      | 25                             | 0                              | 22                               | 33      | 31                     |

<sup>a</sup> 50 µL of a 2.0 mM solution in DMSO : MeOH (1 : 9) of each compound was filled in 9 mm wells in agar media (Standard I Nutrient Agar, Serva or Mueller Hinton II Agar, Becton, Dickinson and Company). Inhibition zones read after incubation at 37 °C for 24 h. Cipro (ciprofloxacin) was dissolved in H<sub>2</sub>O to give a 5 mg/mL solution. <sup>b</sup> p, partially clear inhibition zone/colonies in the inhibition zone. <sup>c</sup> P, unclear inhibition zone/many colonies in the inhibition zone. <sup>d</sup> s, indicates single colonies in the inhibition zone.

**Table 5.**  $^1\text{H}$  and  $^{13}\text{C}$  NMR data for compounds **4**, **12**, **13** in  $\text{CD}_3\text{OD}$  at 298 K.

| <b>4</b>            |                           |                           |                                                                      | <b>12</b>           |                           |                           |                                                                      | <b>13</b>           |                           |                           |                                                                      |
|---------------------|---------------------------|---------------------------|----------------------------------------------------------------------|---------------------|---------------------------|---------------------------|----------------------------------------------------------------------|---------------------|---------------------------|---------------------------|----------------------------------------------------------------------|
| Substructural unit  | $\delta_{\text{C}}$ [ppm] | $\delta_{\text{H}}$ [ppm] | Proton multiplicity <sup>a</sup><br>$J(\text{H}_i, \text{H}_j)$ [Hz] | Substructural unit  | $\delta_{\text{C}}$ [ppm] | $\delta_{\text{H}}$ [ppm] | Proton multiplicity <sup>a</sup><br>$J(\text{H}_i, \text{H}_j)$ [Hz] | Substructural unit  | $\delta_{\text{C}}$ [ppm] | $\delta_{\text{H}}$ [ppm] | Proton multiplicity <sup>a</sup><br>$J(\text{H}_i, \text{H}_j)$ [Hz] |
| C-1                 | 170.7                     |                           |                                                                      | CH <sub>2</sub> -1  | 61.6                      | 3.68                      | t, 5.8                                                               | CH <sub>2</sub> -1  | 61.5                      | 3.68                      | t, 5.8                                                               |
| C-2                 | 120.1                     |                           |                                                                      | CH <sub>2</sub> -2  | 43.3                      | 3.47                      | t, 5.8                                                               | CH <sub>2</sub> -2  | 43.1                      | 3.47                      | t, 5.8                                                               |
| CH-3                | 148.4                     | 8.57                      | dd, 0.7, 2.4                                                         | C-3                 | 169.0                     |                           |                                                                      | C-3                 | 168.5                     |                           |                                                                      |
| C-4                 | 165.3                     |                           |                                                                      | C-4                 | 120.9                     |                           |                                                                      | C-4                 | 120.6                     |                           |                                                                      |
| CH-5                | 108.1                     | 7.10                      | dd, 2.4, 9.0                                                         | CH-5                | 148.5                     | 8.60                      | dd, 2.5, 0.7                                                         | CH-5                | 147.9                     | 8.55                      | d, 2.2                                                               |
| CH-6                | 138.3                     | 8.01                      | dd, 0.7, 9.0                                                         | C-6                 | 165.3                     |                           |                                                                      | C-6                 | 165.3                     |                           |                                                                      |
| CH-7                | 68.5                      | 4.50                      | dd, 4.7, 12.6                                                        | CH-7                | 108.4                     | 7.04                      | dd                                                                   | CH-7                | 107.8                     | 7.10                      | d, 9.0                                                               |
| CH <sub>2</sub> -8  | 24.0                      | 2.41                      | mt, $\Sigma J=43.4$                                                  | CH-8                | 137.5                     | 7.96                      | dd, 8.9                                                              | CH-8                | 137.6                     | 7.99                      | d, 9.0                                                               |
|                     |                           | 1.58                      | mt                                                                   | CH-9                | 62.5                      | 5.14                      | dd, 3.8, 11.9                                                        | CH-9                | 68.6                      | 4.49                      | dd, 4.7, 12.6                                                        |
| CH <sub>2</sub> -9  | 40.2                      | 1.48                      | mt, $\Sigma J=20.4$                                                  | CH <sub>2</sub> -10 | 30.5                      | 2.30                      | mt, $\Sigma J=34.0$                                                  | CH <sub>2</sub> -10 | 23.6                      | 1.57                      | mt                                                                   |
|                     |                           | 1.35                      | ddd 4.2, 13.1, 13.2                                                  |                     |                           | 1.60                      | mt                                                                   |                     |                           | 2.40                      | mt, $\Sigma J=35.5$                                                  |
| C-10                | 33.9                      |                           |                                                                      | CH <sub>2</sub> -11 | 34.2                      | 2.39                      | qd, 13.6, 4.8                                                        | CH <sub>2</sub> -11 | 39.9                      | 1.34                      | mt                                                                   |
| CH <sub>2</sub> -11 | 51.6                      | 1.94                      | dd, 3.0, 13.3                                                        |                     |                           | 1.90                      | mt                                                                   |                     |                           | 1.47                      | mt                                                                   |
|                     |                           |                           | 1.26                                                                 | d, 13.2             | C-12                      | 153.6                     |                                                                      |                     | C-12                      | 33.6                      |                                                                      |
| C-12                | 77.9                      |                           |                                                                      | CH-13               | 47.5                      | 2.34                      | mt, $\Sigma J=20.6$                                                  | CH <sub>2</sub> -13 | 51.4                      | 1.26                      | d, 13.4                                                              |
| CH <sub>2</sub> -13 | 37.6                      | 2.28                      | ddd, 4.1, 7.5, 13.9                                                  | CH-14               | 55.9                      | 1.83                      | mt                                                                   |                     |                           | 1.94                      | dd, 2.9, 13.4                                                        |
|                     |                           | 1.37                      | mt                                                                   | CH <sub>2</sub> -15 | 34.1                      | 1.77                      | dtd, 14.0, 4.2, 1.0                                                  | C-14                | 77.6                      |                           |                                                                      |
| CH <sub>2</sub> -14 | 24.2                      | 1.59                      | mt                                                                   |                     |                           | 1.47                      | mt                                                                   | CH <sub>2</sub> -15 | 37.3                      | 1.38                      | ddd, 4.5, 9.2, 14.4                                                  |
|                     |                           | 1.50                      | ddd, 3.9, 9.1, 9.3                                                   | 2.35                | dt, 13.6, 4.8             | 2.29                      | ddd, 3.9, 7.7, 14.4                                                  |                     |                           |                           |                                                                      |
| CH-15               | 48.2                      | 1.71                      | ddd, 5.5, 8.7, 12.2                                                  | CH <sub>2</sub> -16 | 38.2                      | 1.88                      | mt                                                                   | CH <sub>2</sub> -16 | 23.9                      | 1.51                      | mt                                                                   |

|                     |       |      |                      |                     |        |      |        |                     |                     |      |                      |
|---------------------|-------|------|----------------------|---------------------|--------|------|--------|---------------------|---------------------|------|----------------------|
| CH-16               | 41.61 | 2.12 | ddd, 8.0, 11.1, 11.4 | C-17                | 147.26 |      |        |                     |                     | 1.59 | mt, $\Sigma J=27.0$  |
| CH <sub>2</sub> -17 | 37.4  | 1.54 | dd, 7.9, 9.6         | CH <sub>2</sub> -18 | 37.8   | 1.82 | mt     | CH-17               | 47.9                | 1.71 | mt, $\Sigma J=26.2$  |
|                     |       | 1.40 | mt                   |                     |        |      |        | CH-18               | 41.3                | 2.12 | ddd, 8.0, 10.8, 11.2 |
| C-18                | 35.5  |      |                      | C-19                | 33.8   |      |        | CH <sub>2</sub> -19 | 37.2                | 1.40 | t, 8.1               |
| CH <sub>3</sub> -19 | 30.9  | 1.01 | s                    | CH <sub>3</sub> -20 | 22.0   | 1.00 | S      |                     |                     | 1.54 | dd, 8.1, 9.6         |
| CH <sub>3</sub> -20 | 21.0  | 1.03 | s                    | CH <sub>3</sub> -21 | 30.0   | 1.02 | s      | C-20                | 36.2                |      |                      |
| CH <sub>3</sub> -21 | 27.0  | 0.87 | s                    | CH <sub>2</sub> -22 | 109.9  | 4.98 | mt     | CH <sub>3</sub> -21 | 30.6                | 1.01 | s                    |
|                     |       |      |                      |                     |        |      | 4.87   | t, 1.3              | CH <sub>3</sub> -22 | 20.7 | 1.03                 |
|                     |       |      |                      | CH <sub>2</sub> -23 | 115.5  | 5.10 | d, 2.0 | CH <sub>3</sub> -23 | 26.8                | 0.86 | s                    |
|                     |       |      |                      |                     |        |      | 5.09   | d, 2.0              |                     |      |                      |

a) Due to overlap of several proton signals the values of coupling constants or  $\Sigma J$  could not be always determined.

**Table 6.**  $^1\text{H}$  and  $^{13}\text{C}$  NMR data for compounds **16** and **17** in  $\text{CD}_3\text{OD}$  at 298 K.

| <b>16<sup>a</sup></b> |                           |                           |                                                                             | <b>17</b>           |                           |                           |                                                                             |
|-----------------------|---------------------------|---------------------------|-----------------------------------------------------------------------------|---------------------|---------------------------|---------------------------|-----------------------------------------------------------------------------|
| Substructural unit    | $\delta_{\text{C}}$ [ppm] | $\delta_{\text{H}}$ [ppm] | Proton multiplicity <sup>b</sup><br>J(H <sub>i</sub> ,H <sub>j</sub> ) [Hz] | Substructural unit  | $\delta_{\text{C}}$ [ppm] | $\delta_{\text{H}}$ [ppm] | Proton multiplicity <sup>b</sup><br>J(H <sub>i</sub> ,H <sub>j</sub> ) [Hz] |
| CH <sub>2</sub> -1    | 61.5                      | 3.610                     | t, 5.5                                                                      | CH <sub>2</sub> -1  | 61.3                      | 3.70                      | t, 5.9                                                                      |
| CH <sub>2</sub> -2    | 43.1                      | 3.425                     | t, 5.5                                                                      | CH <sub>2</sub> -2  | 43.2                      | 3.49                      | t, 5.9                                                                      |
| C-3                   | 167.9                     |                           |                                                                             | C-3                 | 169.9                     |                           |                                                                             |
| C-4                   | 134.9                     |                           |                                                                             | C-4                 | 134.9                     |                           |                                                                             |
| CH-5,9                | 127.9                     | 7.780                     | d, 8.3                                                                      | CH-5,9              | 128.2                     | 7.82                      | d, 8.4                                                                      |
| CH-6,8                | 128.2                     | 7.422                     | d, 8.3                                                                      | CH-6,8              | 128.3                     | 7.50                      | d, 8.4                                                                      |
| C-7                   | 140.8                     |                           |                                                                             | C-7                 | 141.7                     |                           |                                                                             |
| NH                    |                           | 7.233                     | t, 5.3                                                                      | CH <sub>2</sub> -10 | 67.5                      | 5.23                      | d, 13.1                                                                     |
| CH <sub>2</sub> -10   | 67.1                      | 5.583                     | d, 13.1                                                                     |                     |                           | 5.20                      | d, 13.1                                                                     |
|                       |                           | 5.092                     | d, 13.1                                                                     |                     |                           |                           |                                                                             |
| C-11                  | 157.3                     |                           |                                                                             | CH-12               | 67.5                      | 4.02                      | dd, 13.1                                                                    |
| CH-12                 | 61.8                      | 4.715                     | bs                                                                          | CH <sub>2</sub> -13 | 24.4                      | 2.32                      | qd, 13.5, 4.4                                                               |
| CH <sub>2</sub> -13   | 24.1                      | 2.340                     | mt                                                                          |                     |                           | 1.57                      | mt                                                                          |
|                       |                           | 1.679                     | mt                                                                          | CH <sub>2</sub> -14 | 39.7                      | 1.47                      | mt                                                                          |
| CH <sub>2</sub> -14   | 38.5                      | 1.473                     | mt                                                                          |                     |                           | 1.32                      | mt                                                                          |
|                       |                           | 1.423                     | mt                                                                          | C-15                | 33.7                      |                           |                                                                             |
| C-15                  | 34.1                      |                           |                                                                             | CH <sub>2</sub> -16 | 51.0                      | 1.86                      | dd, 2.9, 13.4                                                               |
| CH <sub>2</sub> -16   | 44.6                      | 2.351                     | mt                                                                          |                     |                           | 1.16                      | d, 13.4                                                                     |
|                       |                           | 1.952                     | mt                                                                          | C-17                | 77.0                      |                           |                                                                             |
| C-17                  | 97.4                      |                           |                                                                             | CH <sub>2</sub> -18 | 36.7                      | 2.23                      | ddd, 3.8, 8.1, 14.3                                                         |
| CH <sub>2</sub> -18   | 33.9                      | 2.357                     | mt                                                                          |                     |                           | 1.34                      | mt                                                                          |
|                       |                           | 1.824                     | mt                                                                          | CH <sub>2</sub> -19 | 23.6                      | 1.56                      | mt                                                                          |
| CH <sub>2</sub> -19   | 23.6                      | 1.688                     | mt                                                                          |                     |                           | 1.44                      | mt                                                                          |
|                       |                           | 1.444                     | mt                                                                          | CH-20               | 47.7                      | 1.69                      | ddd, 5.7, 8.5, 12.1                                                         |
| CH-20                 | 46.8                      | 1.74                      | ddd, 5.2, 9.1, 12.0                                                         | CH-21               | 41.1                      | 2.07                      | ddd, 8.0, 10.8, 11.8                                                        |
| CH-21                 | 40.7                      | 2.019                     | ddd, 8.1, 10.9, 11.1                                                        | CH <sub>2</sub> -22 | 37.1                      | 1.52                      | dd, 8.0, 9.6                                                                |



|                     |       |       |              |                     |      |      |               |
|---------------------|-------|-------|--------------|---------------------|------|------|---------------|
| CH <sub>2</sub> -22 | 36.64 | 1.518 | dd, 8.1, 9.5 |                     |      | 1.37 | dd, 9.6, 10.6 |
|                     |       | 1.387 | t, 10.0      | C-23                | 35.3 |      |               |
| C-23                | 34.8  |       |              | CH <sub>3</sub> -24 | 30.6 | 0.99 | s             |
| CH <sub>3</sub> -24 | 30.3  | 0.993 | s            | CH <sub>3</sub> -25 | 20.7 | 1.00 | s             |
| CH <sub>3</sub> -25 | 20.6  | 0.996 | s            | CH <sub>3</sub> -26 | 26.7 | 0.84 | s             |
| CH <sub>3</sub> -26 | 26.5  | 0.867 | s            |                     |      |      |               |

a) In CD<sub>3</sub>CN

b) Due to overlap of several proton signals the values of coupling constants or  $\Sigma J$  could not be always determined.

Compound 4

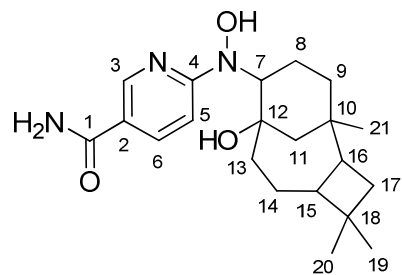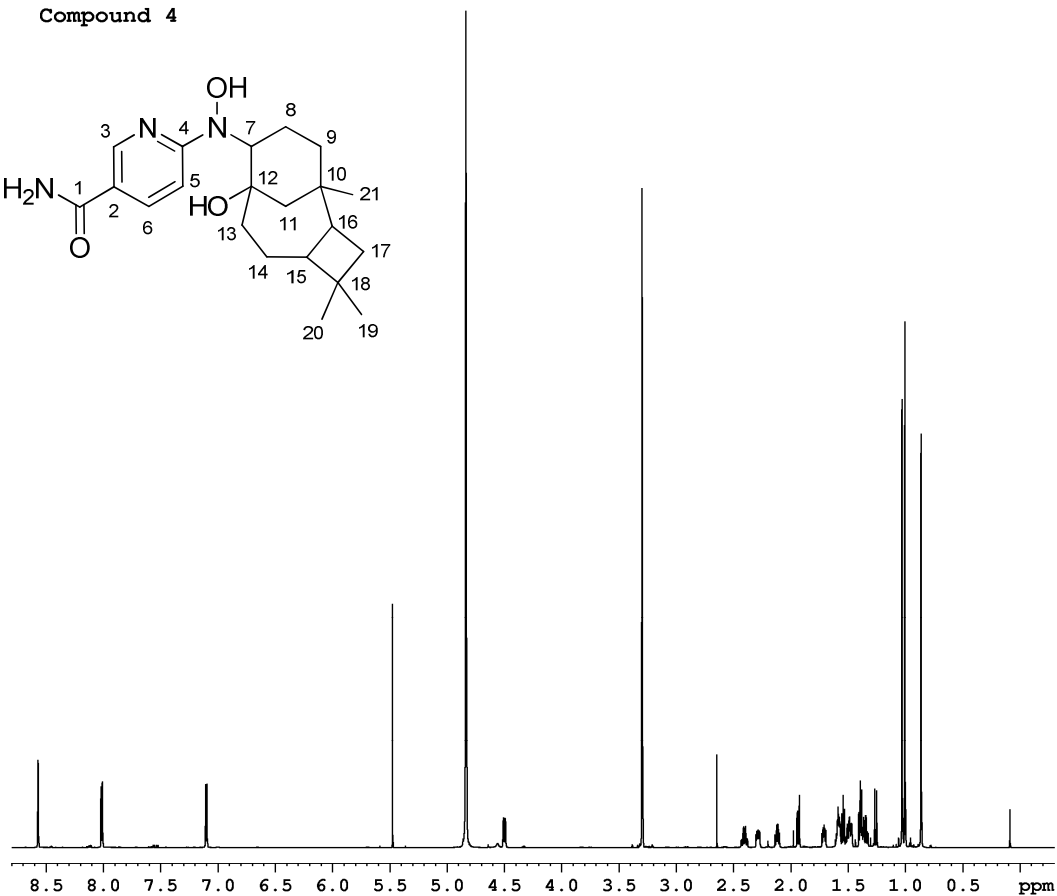

```
NAME          Compound 4
EXPNO          10
PROCNO         1
Date_          20090207
Time           10.13
INSTRUM        spect
PROBHD         5 mm CPTCI 1H-
PULPROG        zg
TD             65536
SOLVENT        MeOD
NS             64
DS             2
SWH            8223.685 Hz
FIDRES         0.125483 Hz
AQ            3.9846387 sec
RG             45.2
DW            60.800 usec
DE            30.00 usec
TE            301.9 K
D1            1.00000000 sec
TD0           1
```

```
===== CHANNEL f1 =====
NUC1           1H
P1             6.00 usec
PL1           1.00 dB
SFO1          800.1837640 MHz
SI            131072
SF            800.1800262 MHz
WDW           no
SSB           0
LB            0.00 Hz
GB           0
PC            1.00
```

$^1\text{H}$  spectrum of 4 in  $\text{CD}_3\text{OD}$  at  $25^\circ\text{C}$ .

|                               |             |                         |                 |                               |             |                              |             |
|-------------------------------|-------------|-------------------------|-----------------|-------------------------------|-------------|------------------------------|-------------|
| <b>Acquisition Time (sec)</b> | 1.7826      | <b>Comment</b>          | Compound 4      |                               | <b>Date</b> | Feb 10 2009                  |             |
| <b>Date Stamp</b>             | Feb 10 2009 |                         |                 |                               |             |                              |             |
| <b>Frequency (MHz)</b>        | 150.85      | <b>Nucleus</b>          | <sup>13</sup> C | <b>Number of Transients</b>   | 7200        | <b>Original Points Count</b> | 65536       |
| <b>Points Count</b>           | 65536       | <b>Pulse Sequence</b>   | APT             | <b>Receiver Gain</b>          | 60.00       | <b>Solvent</b>               | METHANOL-d4 |
| <b>Spectrum Offset (Hz)</b>   | 15459.1543  | <b>Sweep Width (Hz)</b> | 36764.71        | <b>Temperature (degree C)</b> | 22.000      |                              |             |

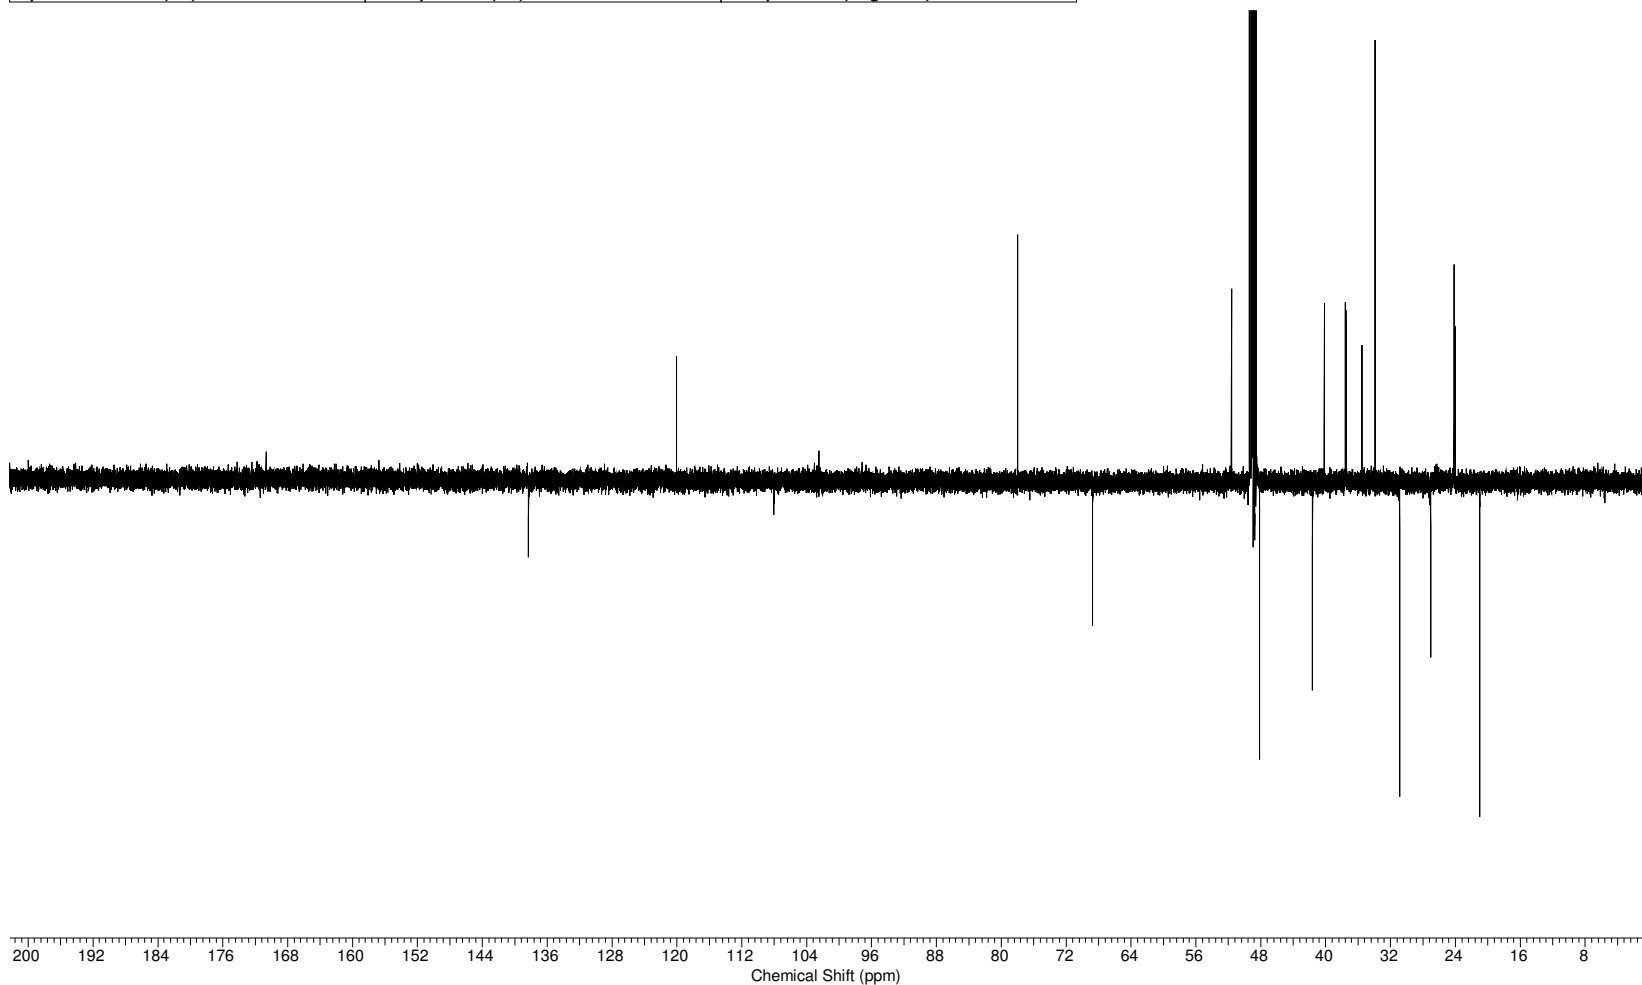

<sup>13</sup>C APT spectrum of **4** in CD<sub>3</sub>OD at 25° C.

Compound 4

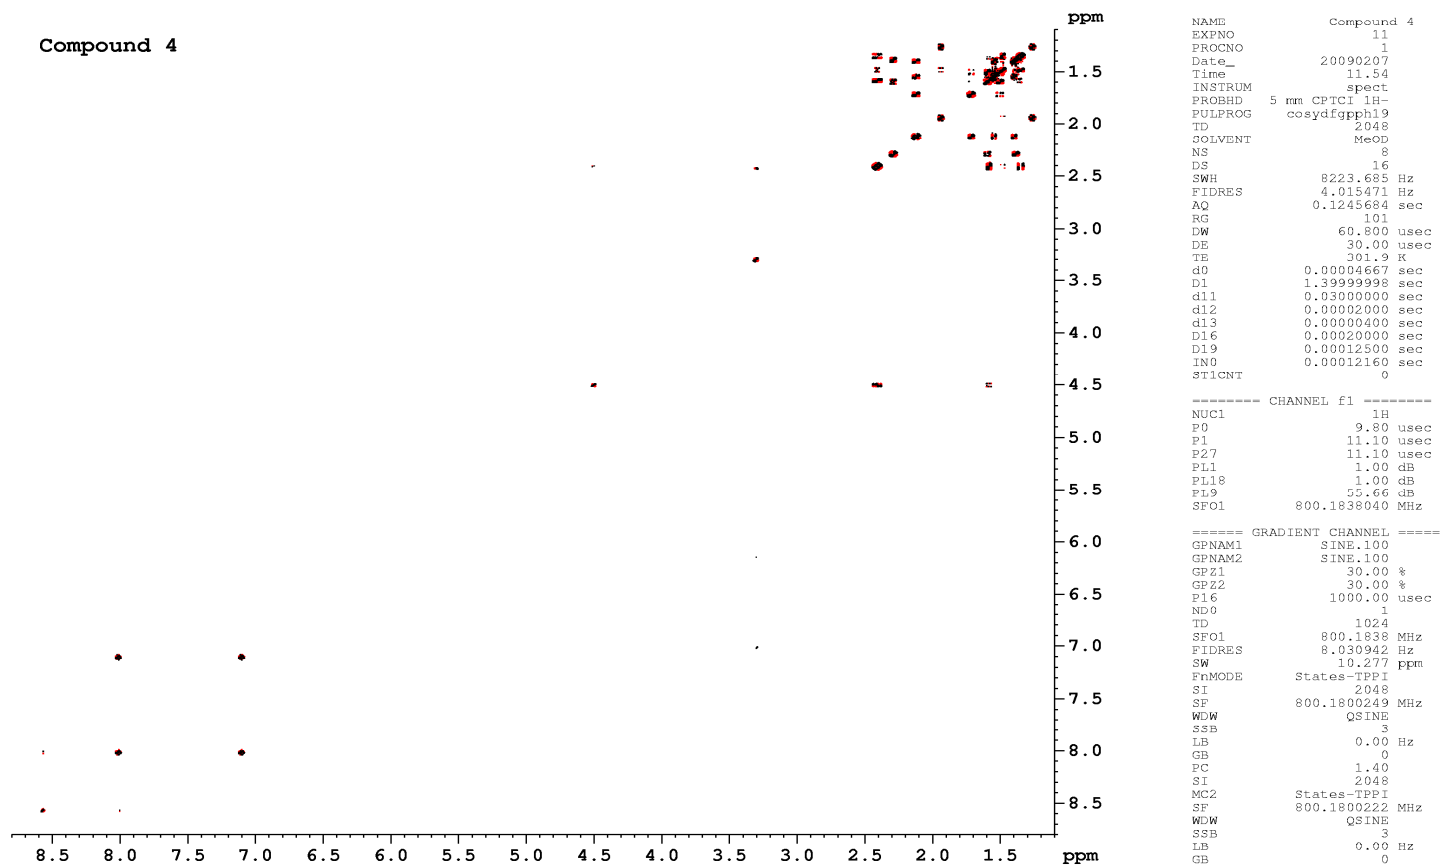

2D DQF-COSY spectrum of **4** in CD<sub>3</sub>OD at 25° C. The black and red contours represent positive and negative peaks, respectively.

Compound 4

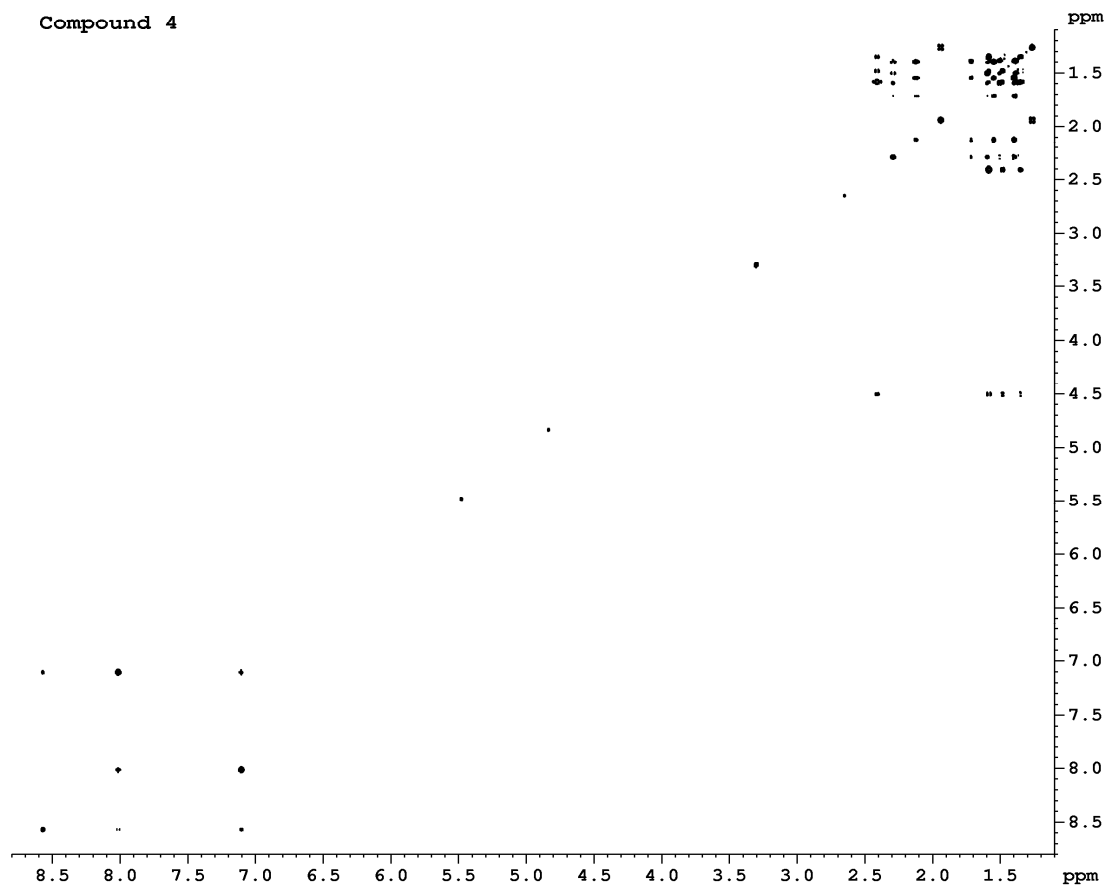

```

NAME          Compound 4
EXPNO         12
PROCNO        1
Date_         20090207
Time          15.32
INSTRUM       spect
PROBHD        5 mm CPXI 1H-
PULPROG       dipsi2etgpsi19
TD            2048
SOLVENT       MeOD
NS            8
DS            16
SWH           8223.685 Hz
FIDRES        4.015473 Hz
AQ            0.1245684 sec
RG            114
DW            60.800 usec
DE            30.00 usec
TE            301.9 K
d0            0.00000300 sec
d1            1.39999998 sec
d11           0.03000000 sec
d12           0.00002000 sec
d13           0.00000400 sec
d16           0.00020000 sec
d19           0.00012500 sec
d20           0.00001000 sec
d21           0.00001000 sec
d9            0.05100000 sec
DELTA         0.00120300 sec
FACTOR1       11
IN0           0.00012140 sec
l1            22
STICNT        0

----- CHANNEL f1 -----
NUC1          1H
P0            9.80 usec
P1            11.10 usec
P2            22.20 usec
P27           11.10 usec
P6            24.00 usec
PL1           1.00 dB
PL10          7.70 dB
PL18          1.00 dB
PL9           55.66 dB
SFO1          800.1838040 MHz

----- GRADIENT CHANNEL -----
GPNAM1        SINE.100
GPNAM2        SINE.100
GPNAM3        SINE.100
GP21          30.00 %
GP22          20.00 %
GP23          50.00 %
P16           1000.00 usec
NDO           1
TD            1024
SFO1          800.1838 MHz
FIDRES        8.030942 Hz
SW            10.277 ppm
FhMODE        Echo-Antiecho
SI            2048
SF            800.1800249 MHz
WDW           QSINE
SSB           2
LB            0.00 Hz
GB            0
PC            1.40
SI            2048
MCZ           echo-antiecho
SF            800.1800250 MHz
WDW           QSINE
SSB           2
LB            0.00 Hz
GB            0
    
```

2D TOCSY spectrum of 4 in CD<sub>3</sub>OD at 25° C.

Compound 4

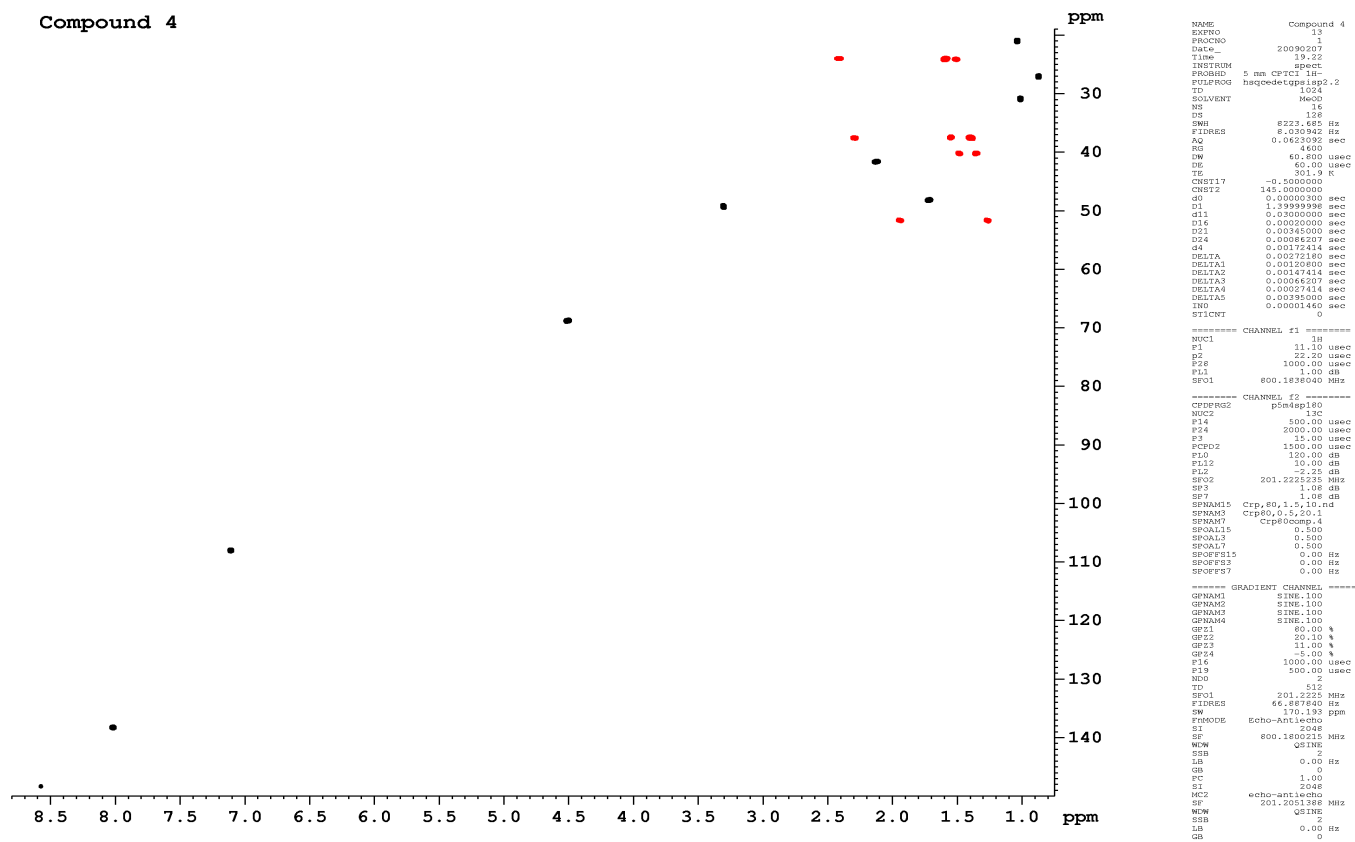

2D  $^{13}\text{C}$ -HSQC spectrum of **4** in  $\text{CD}_3\text{OD}$  at  $25^\circ\text{C}$ . The horizontal and vertical axes display  $^1\text{H}$  and  $^{13}\text{C}$  chemical shifts, respectively. The black cross-peaks correspond to  $\text{CH}_3$  and  $\text{CH}$  groups, the red cross-peaks correspond to  $\text{CH}_2$  groups.

Compound 4

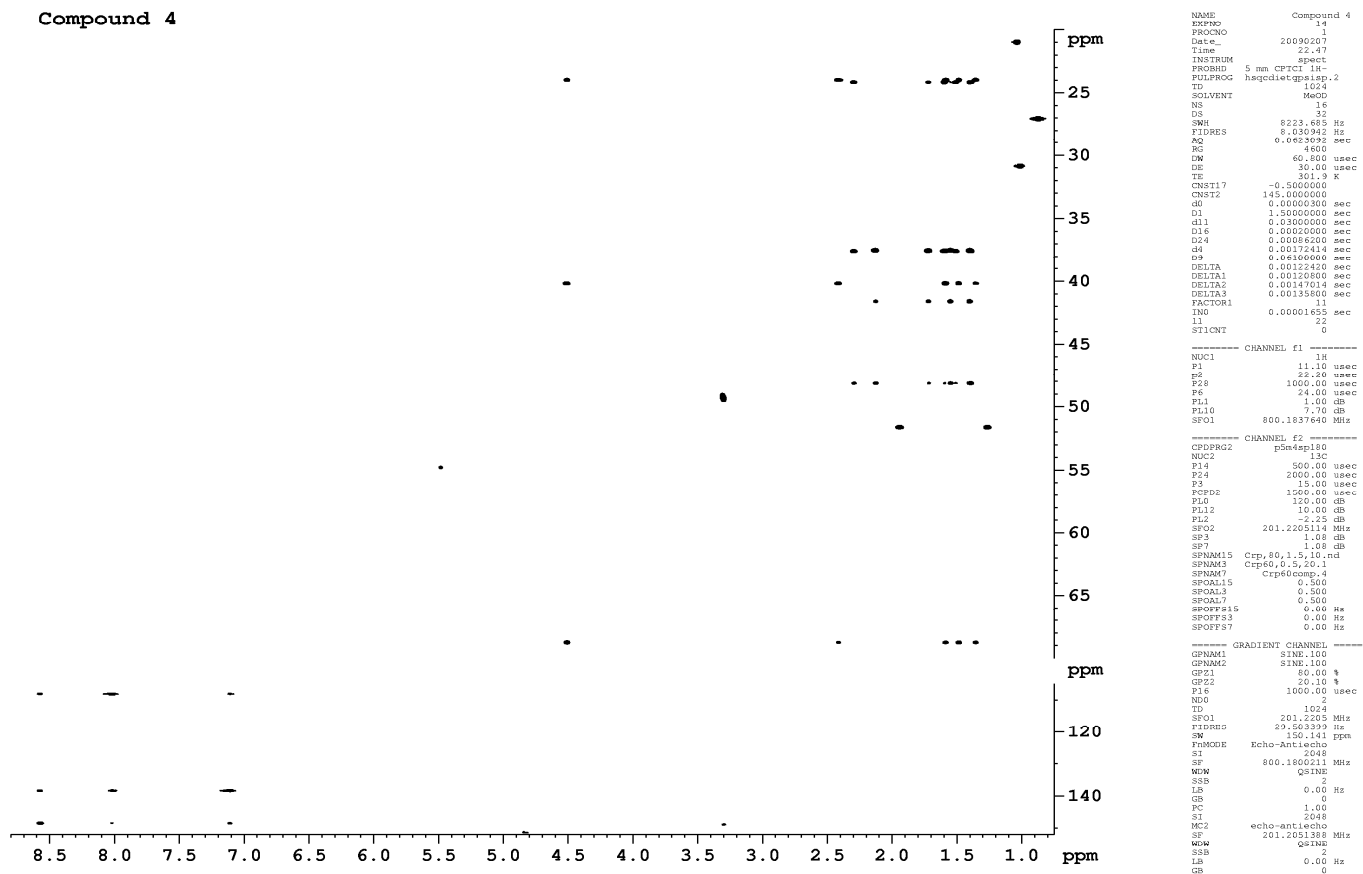

2D  $^{13}\text{C}$ -HSQC-TOCSY spectrum of **4** in  $\text{CD}_3\text{OD}$  at  $25^\circ\text{C}$ . The horizontal and vertical axes display  $^1\text{H}$  and  $^{13}\text{C}$  chemical shifts, respectively.

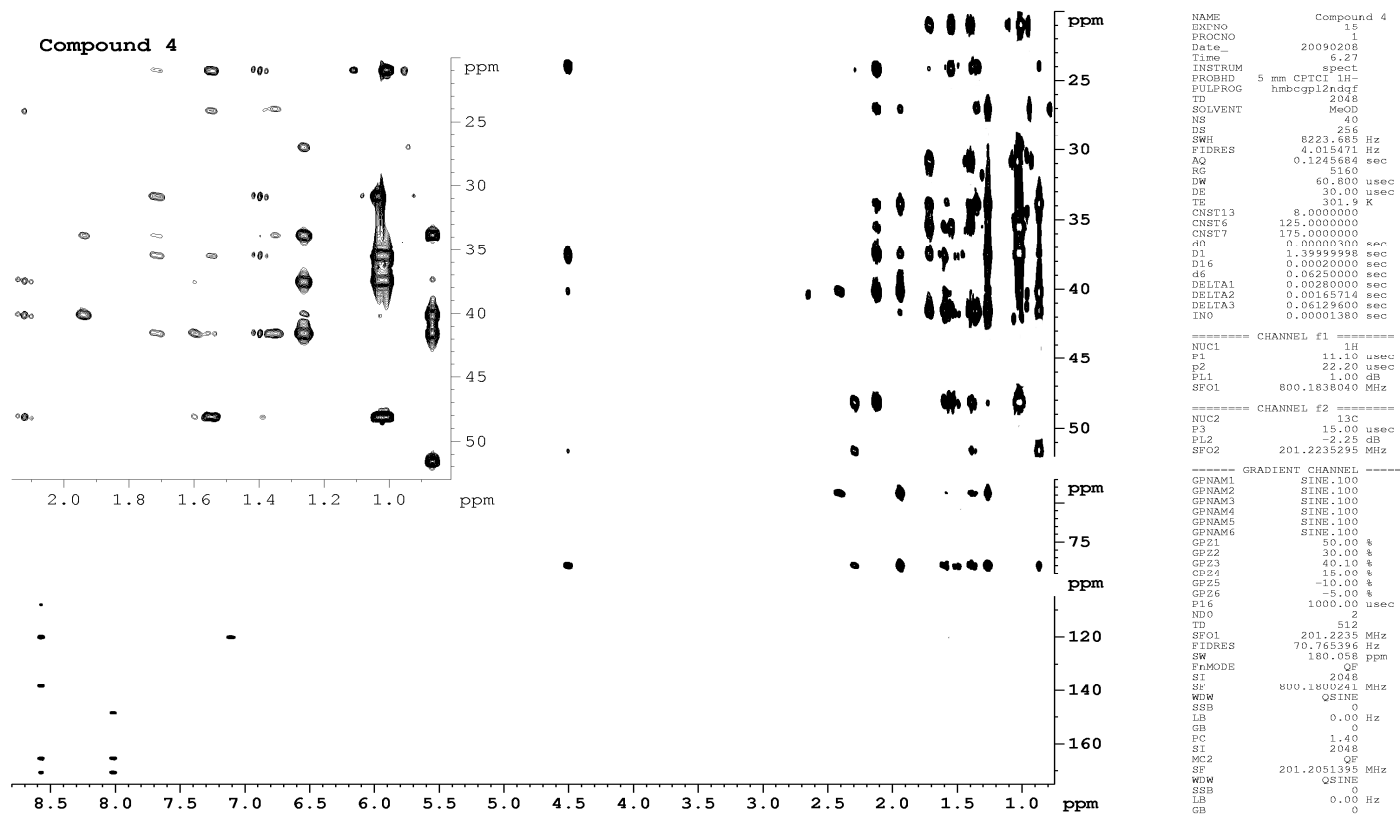

2D <sup>13</sup>C-HMBC spectrum of **4** in CD<sub>3</sub>OD at 25° C. The horizontal and vertical axes display <sup>1</sup>H and <sup>13</sup>C chemical shifts, respectively. The insert in the upper left corner represents an expansion of the high field region plotted with reduced cross-peaks intensities for a better clarity.



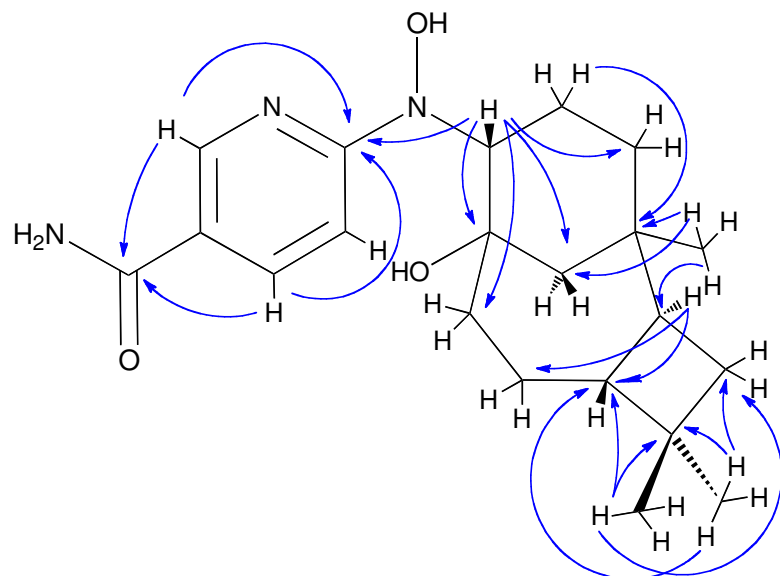

Correlation diagram for compound **4**. The HMBC correlations (in blue), together with proton-proton correlations in DQF-COSY and TOCSY spectra and one bond proton-carbon correlations in the HSQC spectrum unambiguously establish the proposed structure of compound **4**.

Compound 12

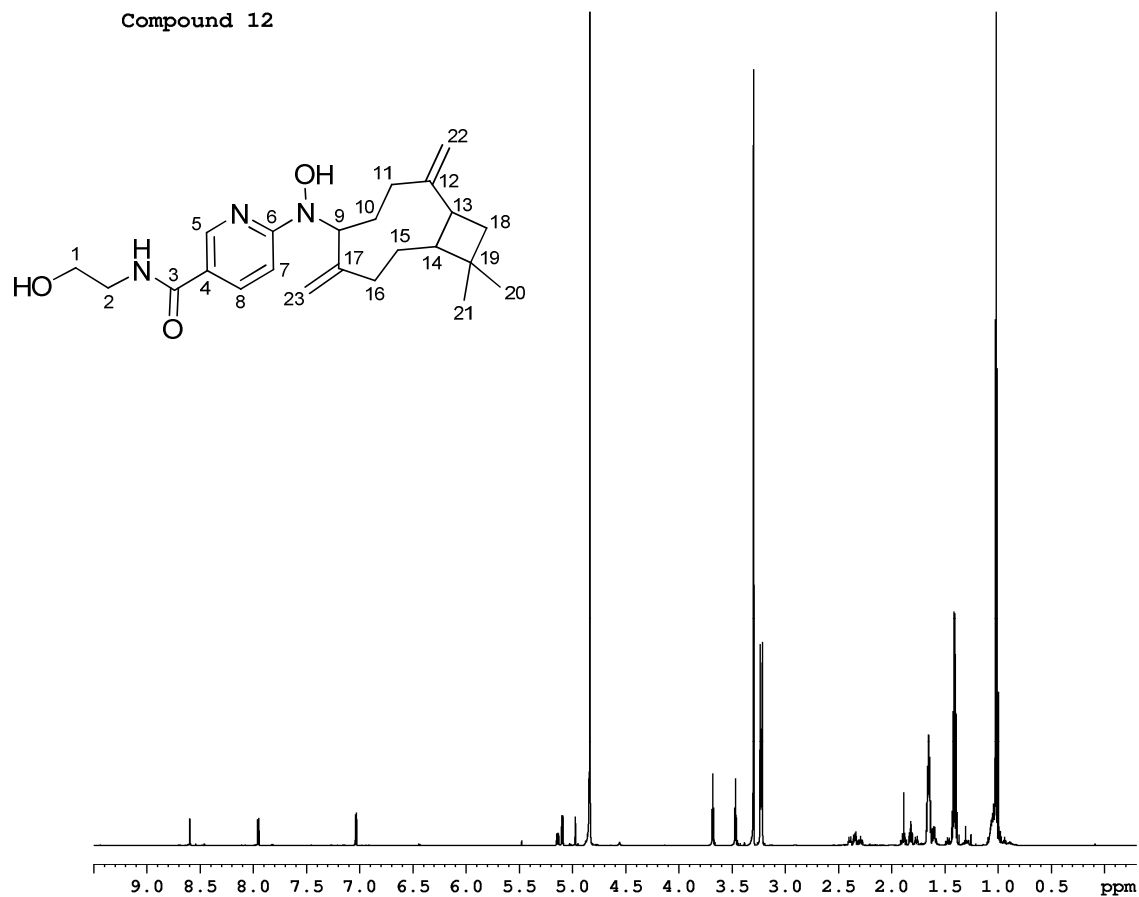

```

NAME          Compound 12
EXPNO         1
PROCNO        1
Date_         20091117
Time          11.47
INSTRUM       spect
PROBHD        5 mm CPTCI 1H-
PULPROG       zg
TD            65536
SOLVENT       MeOD
NS            256
DS            4
SWH           8223.685 Hz
FIDRES        0.125483 Hz
AQ            3.9846387 sec
RG            32
DW            60.800 usec
DE            30.00 usec
TE            301.9 K
D1            0.10000000 sec
TD0           1
    
```

```

===== CHANNEL f1 =====
NUC1          1H
P1            10.30 usec
PL1           0.20 dB
SFO1          800.1837640 MHz
SI            131072
SF            800.1800263 MHz
WDW           no
SSB           0
LB            0.00 Hz
GB            0
PC            1.00
    
```

<sup>1</sup>H spectrum of **12** in CD<sub>3</sub>OD at 25° C.

Compound 12

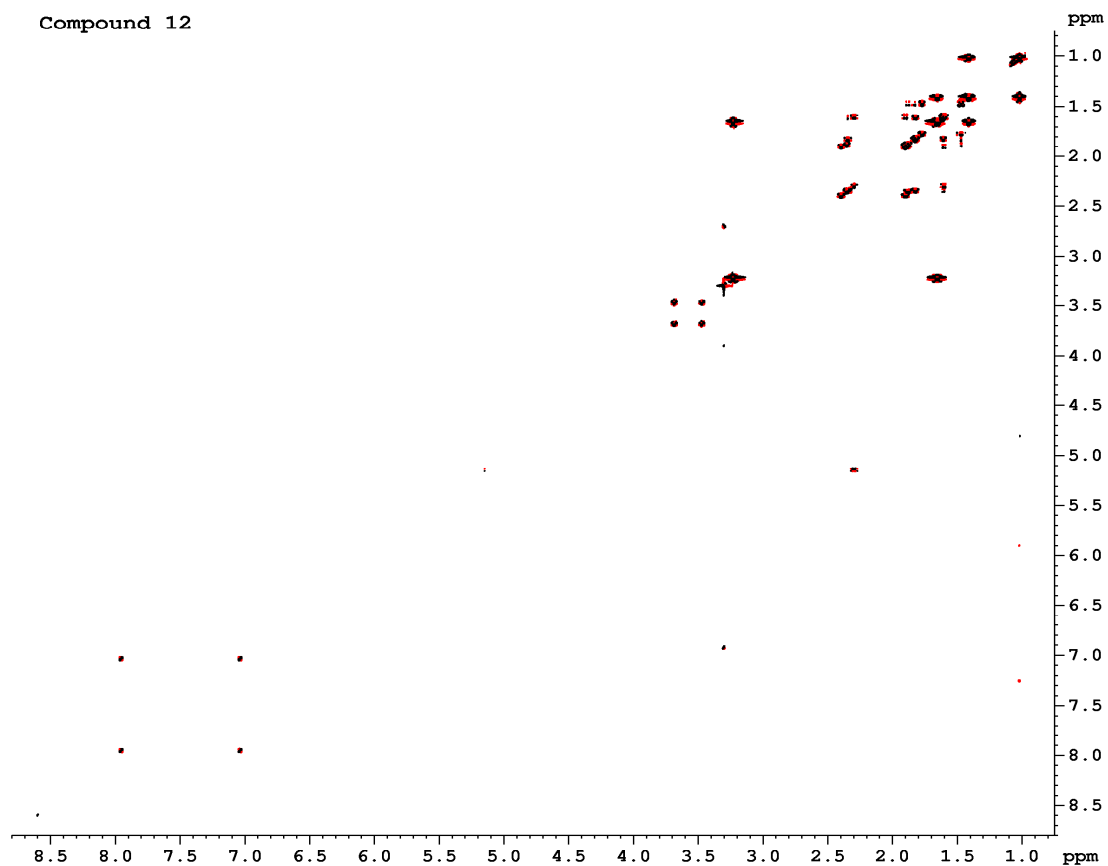

```

NAME          Compound 12
EXNO          2
PROCNO       1
Date_        20091117
Time         13.35
INSTRUM      spect
PROBHD       5 mm CPTCI 1H-
PULPROG      cosydfgpph19
TD           2048
SOLVENT      MeOD
NS           24
DS           16
SWH          8223.685 Hz
FIDRES       4.015471 Hz
AQ           0.1245684 sec
RG           114
DW           60.800 usec
DE           30.00 usec
TE           301.9 K
d0           0.00004769 sec
d1           1.39999998 sec
d11          0.03000000 sec
d12          0.00020000 sec
d13          0.00004000 sec
D16          0.00020000 sec
D19          0.00012500 sec
IN0          0.00012160 sec
ST1CNT       0

===== CHANNEL f1 =====
NUC1         1H
P0           9.20 usec
P1           10.30 usec
P27          10.30 usec
PL1          0.20 dB
PL18         0.20 dB
PL19         55.66 dB
SFO1         800.1838776 MHz

===== GRADIENT CHANNEL =====
GPNAM1      SINE.100
GPNAM2      SINE.100
GPZ1        30.00 %
GPZ2        30.00 %
P16         1000.00 usec
ND0         1
TD           1024
SFO1         800.1839 MHz
FIDRES       8.030942 Hz
SW           10.277 ppm
F2MODE      States-TFPI
SI           2048
SF           800.1800263 MHz
WDW          QSINE
SSB          3
LB           0.00 Hz
GB           0
PC           1.40
SI           2048
MC2         States-TFPI
SF           800.1800264 MHz
WDW          QSINE
SSB          3
LB           0.00 Hz
GB           0
    
```

2D DQF-COSY spectrum of **12** in CD<sub>3</sub>OD at 25° C. The black and red contours represent positive and negative peaks, respectively.

Compound 12

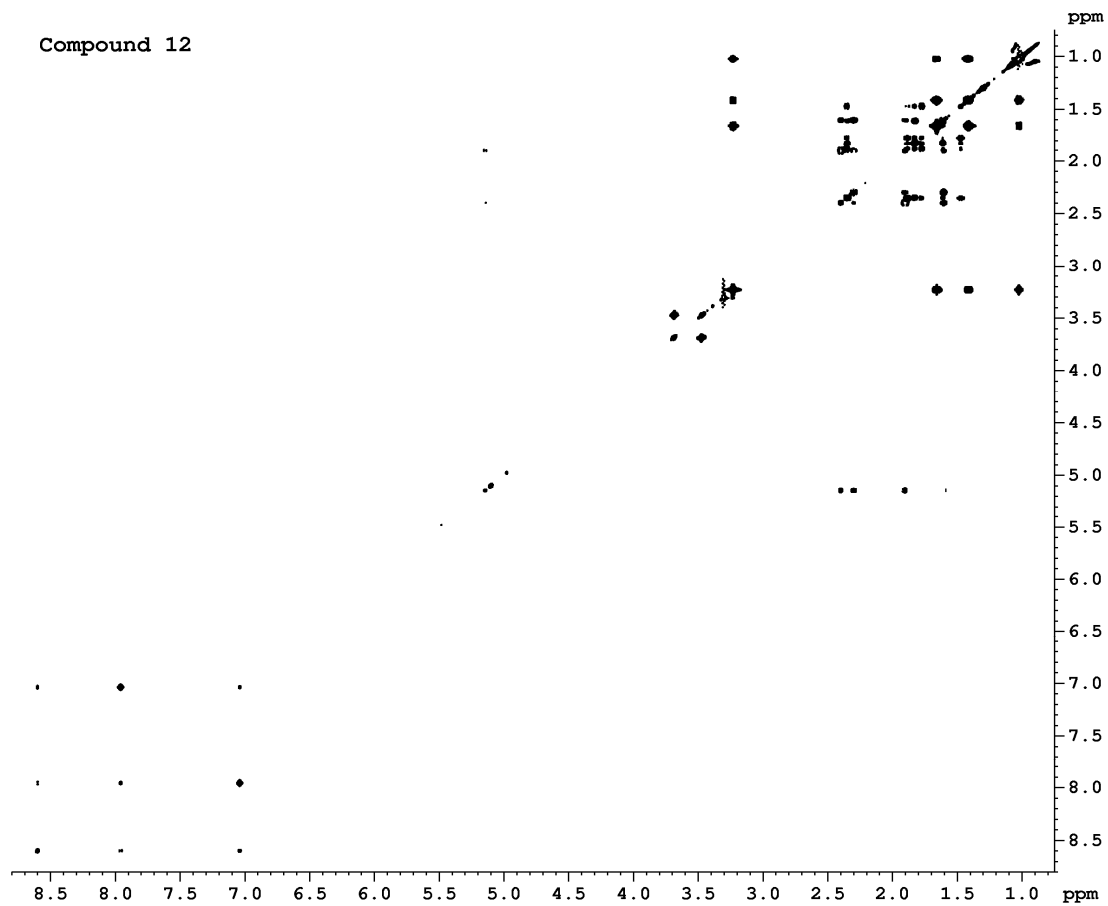

```
NAME          Compound 12
EXPNO         3
PROCNO       1
Date_         20091118
Time         0.28
INSTRUM      spect
PROBHD       5 mm CPTCI 1H-
PULPROG      d1psi2etgpsi19
TD           2048
SOLVENT      MeOD
NS           24
DS           16
SWH          8223.685 Hz
FIDRES       4.015471 Hz
AQ           0.1245684 sec
RG           101
DW           60.800 usec
DE           30.00 usec
TE           301.9 K
d0           0.00000000 sec
d1           1.39999998 sec
d11          0.03000000 sec
d12          0.00002000 sec
d13          0.00000400 sec
d16          0.00020000 sec
d19          0.00012500 sec
d20          0.00001000 sec
d21          0.00001000 sec
D9           0.06000000 sec
DELTA        0.00120300 sec
FACTOR1      11
l1           0.00012180 sec
l1           22
ST1CNT       0

===== CHANNEL f1 =====
NUC1         1H
P0           10.30 usec
P1           10.30 usec
P2           20.60 usec
P27          10.30 usec
P6           24.00 usec
PL1          0.20 dB
PL10         7.55 dB
PL18         0.20 dB
PL9          55.66 dB
SFO1         800.1838676 MHz

===== GRADIENT CHANNEL =====
GPNAM1      SINE.100
GPNAM2      SINE.100
GPNAM3      SINE.100
GPZ1        50.00 %
GPZ2        20.00 %
GPZ3        50.00 %
PI6         1000.00 usec
ND0         1
TD           1024
SFO1         800.1839 MHz
FIDRES       8.030942 Hz
SW           10.277 ppm
FnmODE      Echo-Antiecho
SI           2048
SF           800.1800244 MHz
WDW          QSINE
LB           2
GB           0
PC           1.40
SI           2048
MC2          echo-antiecho
SF           800.1800244 MHz
WDW          QSINE
SSB          2
LB           0.00 Hz
GB           0
```

2D TOCSY spectrum of **12** in CD<sub>3</sub>OD at 25° C.

Compound 12

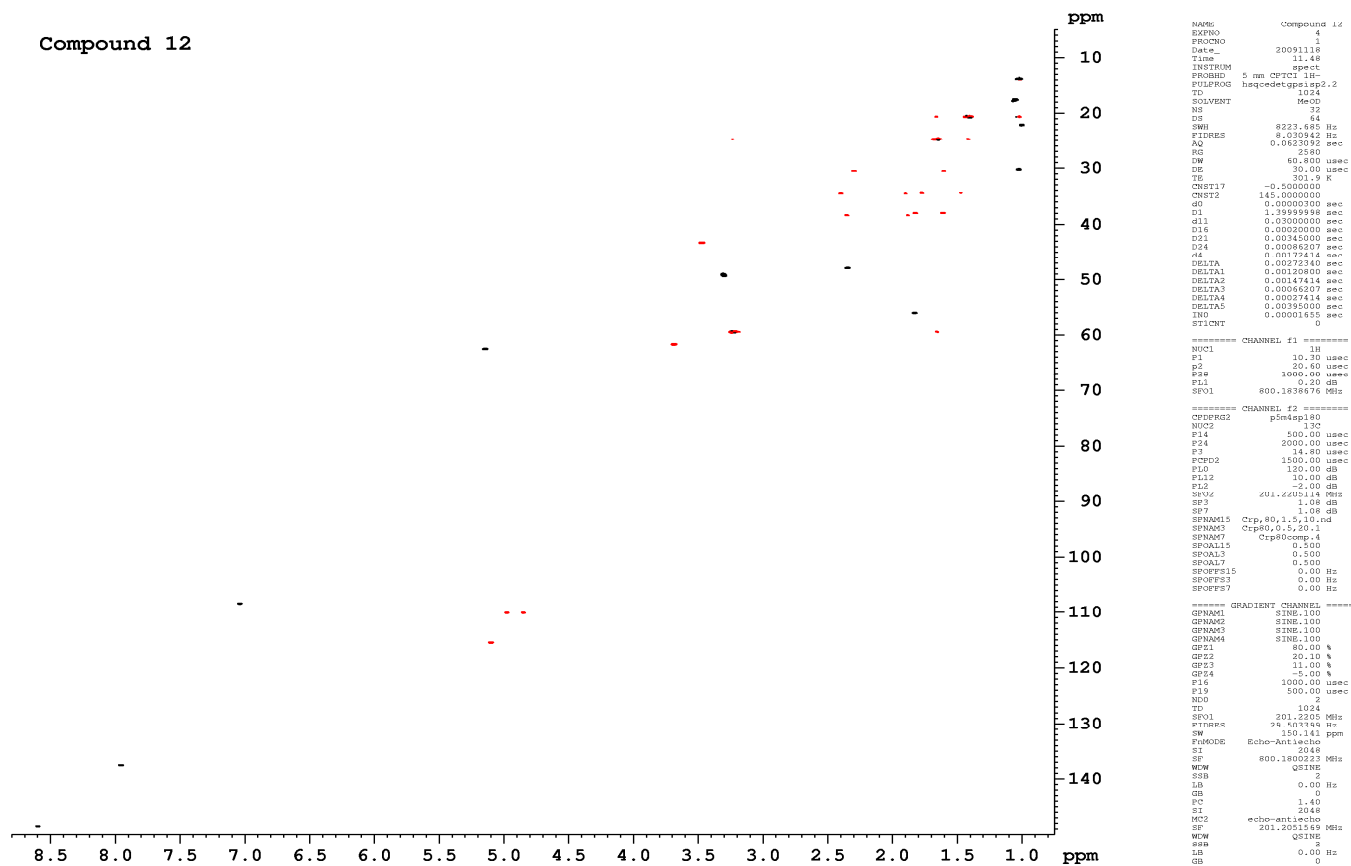

2D  $^{13}\text{C}$ -HSQC spectrum of **12** in  $\text{CD}_3\text{OD}$  at  $25^\circ\text{C}$ . The horizontal and vertical axes display  $^1\text{H}$  and  $^{13}\text{C}$  chemical shifts, respectively. The black cross-peaks correspond to  $\text{CH}_3$  and  $\text{CH}$  groups, the red cross-peaks correspond to  $\text{CH}_2$  groups.

Compound 12

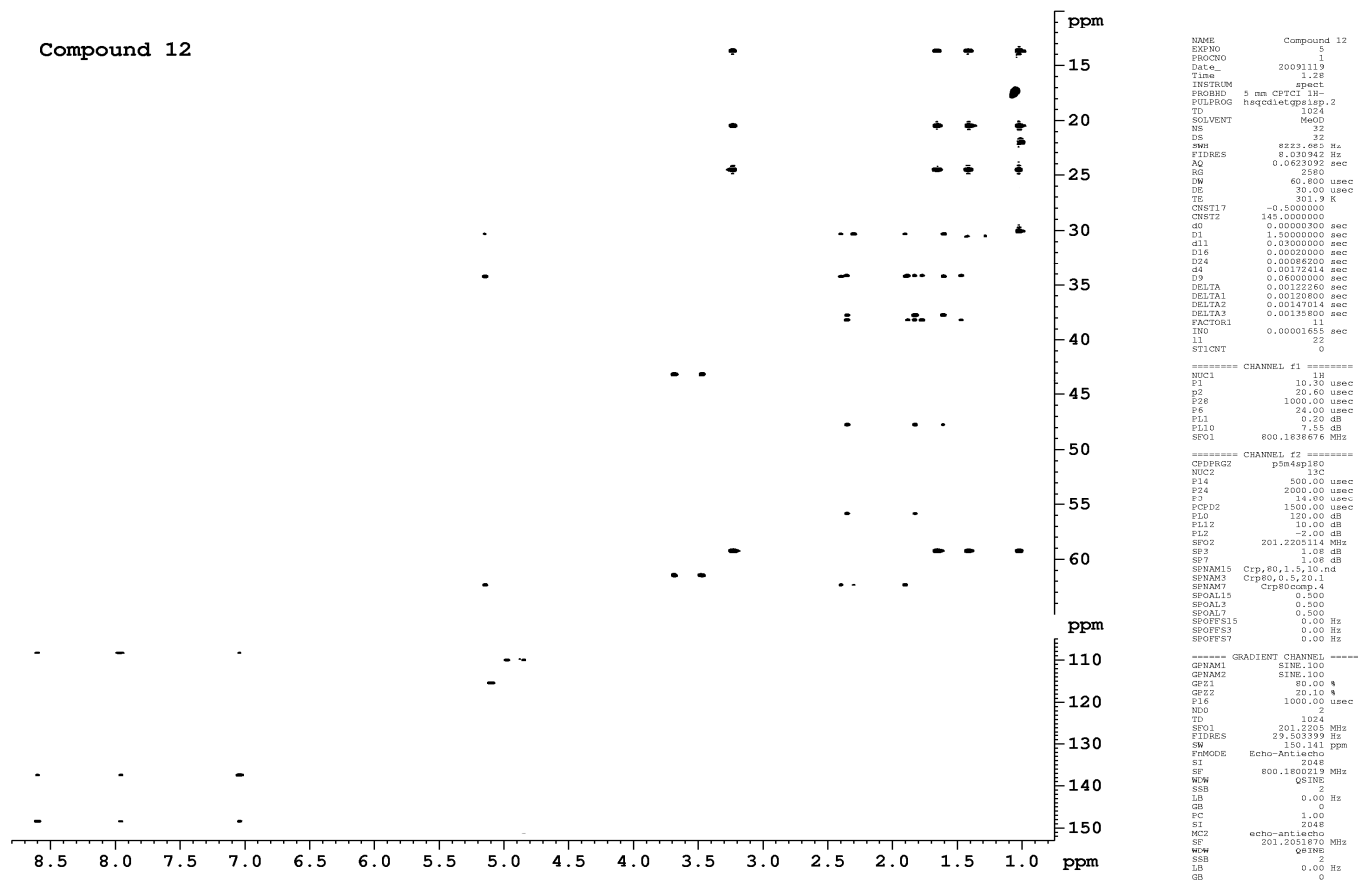

2D  $^{13}\text{C}$ -HSQC-TOCSY spectrum of **12** in  $\text{CD}_3\text{OD}$  at  $25^\circ\text{C}$ . The horizontal and vertical axes display  $^1\text{H}$  and  $^{13}\text{C}$  chemical shifts, respectively.

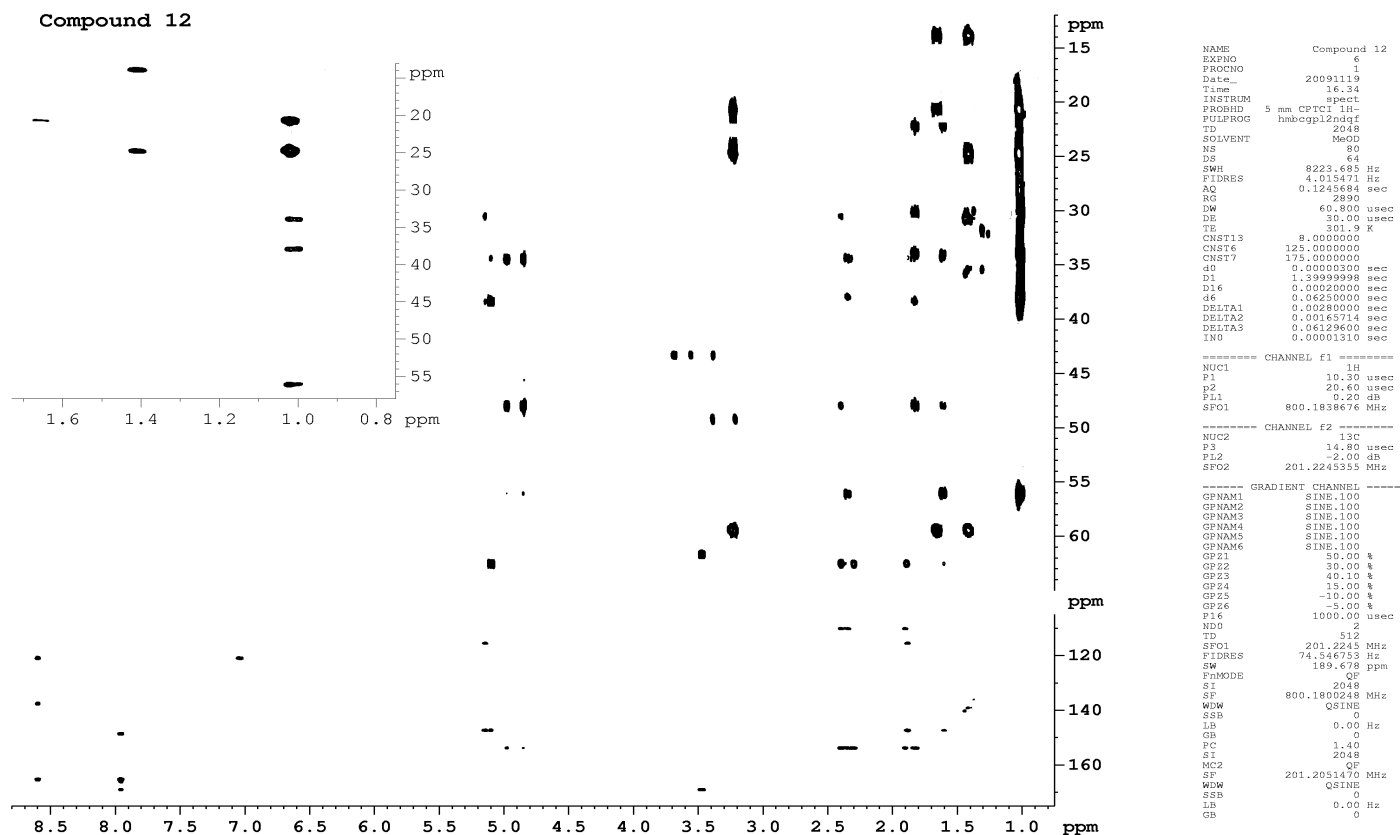

2D  $^{13}\text{C}$ -HMBC spectrum of **12** in  $\text{CD}_3\text{OD}$  at  $25^\circ\text{C}$ . The horizontal and vertical axes display  $^1\text{H}$  and  $^{13}\text{C}$  chemical shifts, respectively. The insert in the upper left corner represents an expansion of the high field region plotted with reduced cross-peaks intensities for a better clarity.



Compound 13

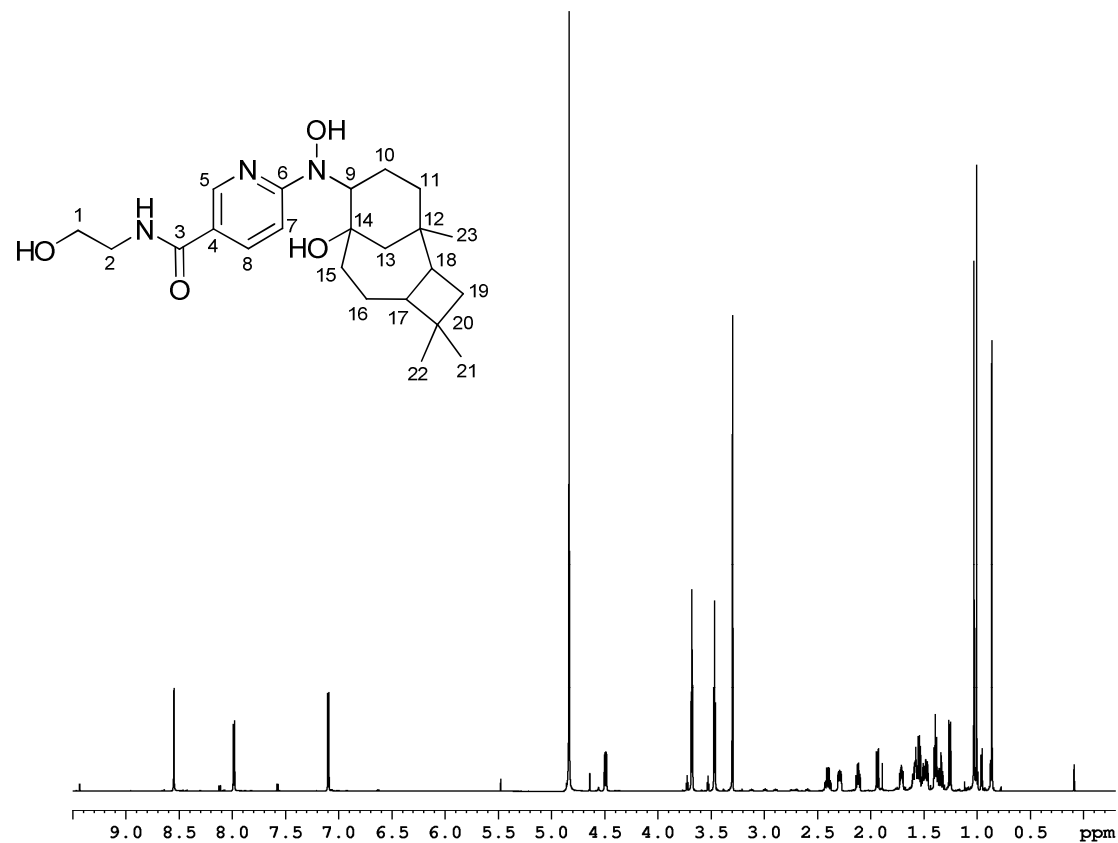

```

NAME          Compound 13
EXPNO         1
PROCNO        1
Date_         20091113
Time          17.27
INSTRUM       spect
PROBHD        5 mm CPTCI 1H-
PULPROG       zg
TD            65536
SOLVENT       MeOD
NS            64
DS            0
SWH           8223.685 Hz
FIDRES        0.125483 Hz
AQ            3.9846387 sec
RG            32
DW            60.800 usec
DE            30.00 usec
TE            301.9 K
D1            0.10000000 sec
TD0           1
    
```

```

===== CHANNEL f1 =====
NUC1          1H
P1            6.00 usec
PL1           0.20 dB
SFO1          800.1837640 MHz
SI            131072
SF            800.1800262 MHz
WDW           no
SSB           0
LB            0.00 Hz
GB            0
PC            1.00
    
```

<sup>1</sup>H spectrum of **13** in CD<sub>3</sub>OD at 25° C.

Compound 13

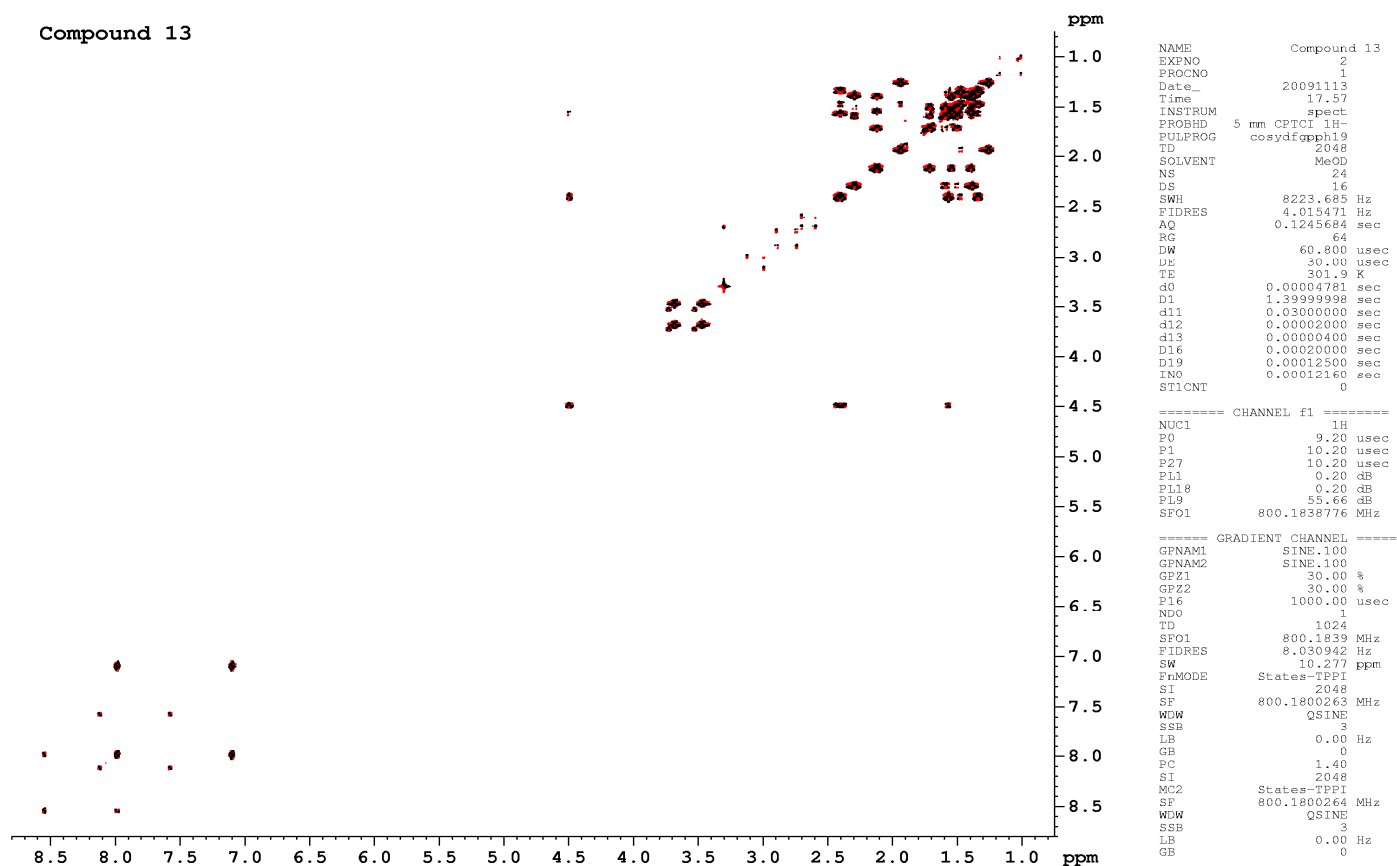

2D DQF-COSY spectrum of **13** in CD<sub>3</sub>OD at 25° C. The black and red contours represent positive and negative peaks, respectively.

Compound 13

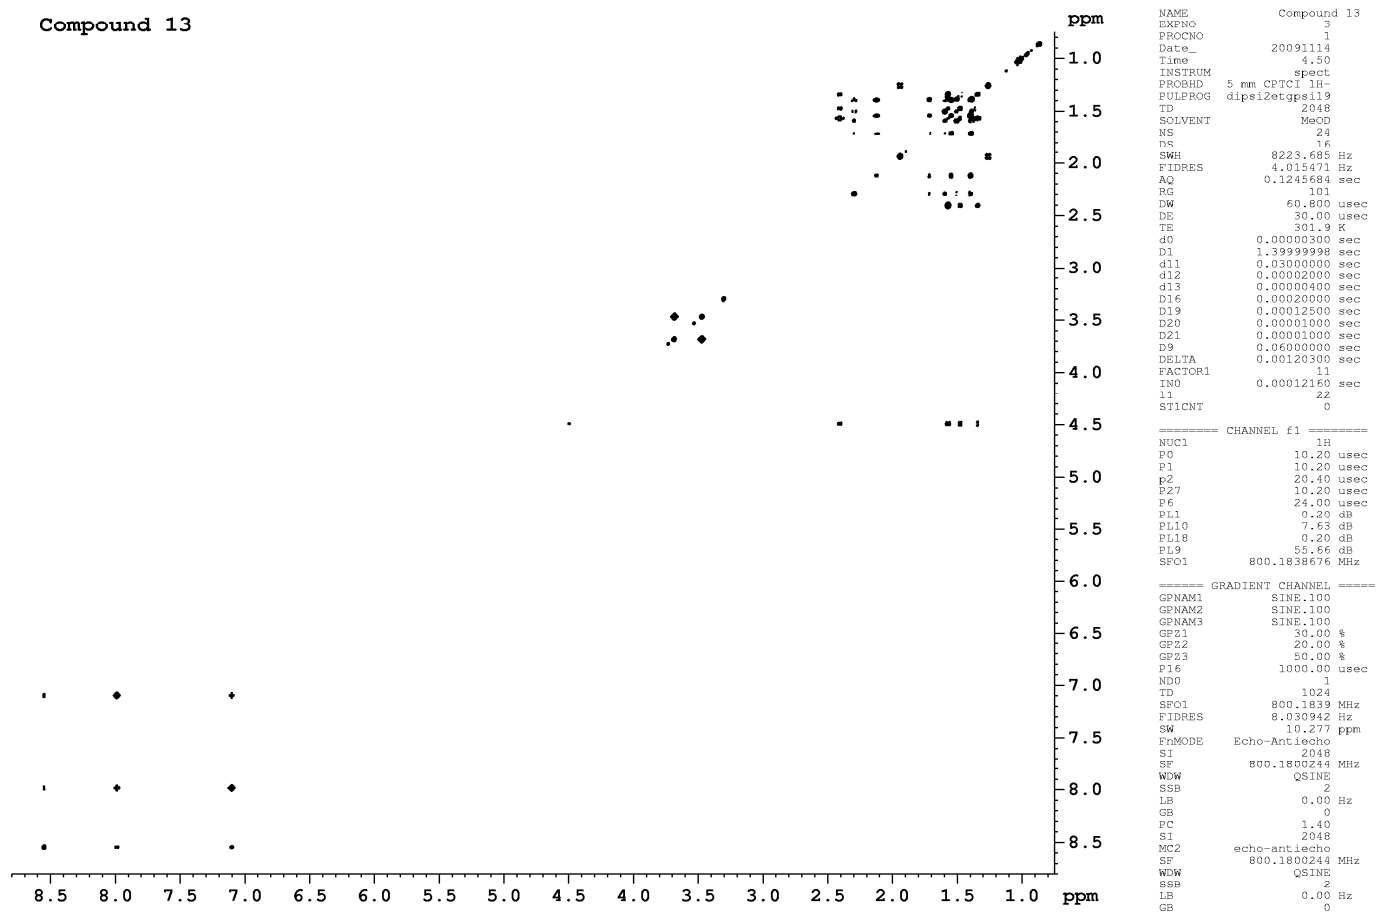

2D TOCSY spectrum of **13** in CD<sub>3</sub>OD at 25° C.

Compound 13

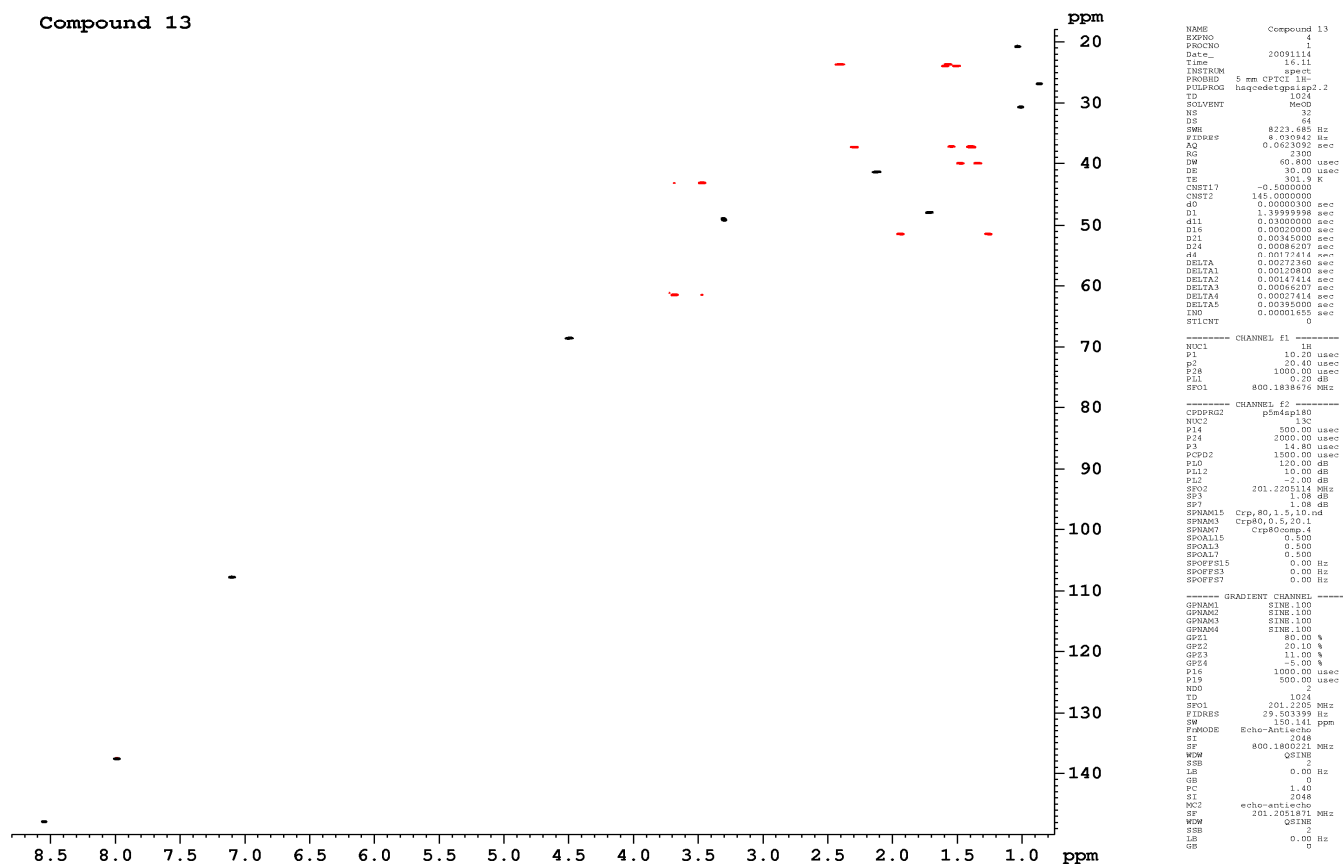

```

NAME          Compound 13
EXPNO         4
PROCNO        1
Date_         20091114
Time          15.11
INSTRUM       spect
PROBHD        5 mm CPTCI 1h-
PULPROG       hsqcetdetspp2.2
TD            1024
SOLVENT       MeCD
NS            32
DS            64
SWS           8223.685 Hz
FIDRES        8.039842 Hz
AQ            0.0623993 sec
RG            7800
DM            60.800 usec
DE            30.00 usec
TE            301.2 K
CNS117        -0.5000000
CNS122        145.0000000
d0            0.0000000 sec
D1            1.39999996 sec
d11           0.0300000 sec
D16           0.0002000 sec
D21           0.0034000 sec
D24           0.0008620 sec
d4            0.0017614 sec
DELTA         0.0027286 sec
DELTA1        0.0012000 sec
DELTA2        0.00147414 sec
DELTA3        0.0006000 sec
DELTA4        0.00027414 sec
DELTA5        0.00395000 sec
IND           0.00001655 sec
STLCNT        0

----- CHANNEL f1 -----
NUC1          1H
P1            10.00 usec
P2            20.40 usec
P2A           1000.00 usec
P21           0.25 dB
SFO1          800.1803479 MHz

----- CHANNEL f2 -----
CPDPRG2      pnm4e180
NUC2          13C
P14           500.00 usec
P24           2000.00 usec
P3            14.80 usec
PCPD2         1500.00 usec
P10           120.00 dB
P12           10.00 dB
P13           -2.00 dB
SFO2          201.2205114 MHz
SF3           1.00 dB
SF7           1.00 dB
SFRAMA15     Ccp,80,1.5,10.0d
SFRAMA3      Ccp80,0.5,20.1
SFRAMA7      Ccp80cm8,4
SFOAL15      0.500
SFOAL3       0.500
SFOAL7       0.500
SPOFF15      0.00 Hz
SPOFF3       0.00 Hz
SPOFF7       0.00 Hz

----- GRADIENT CHANNEL -----
GPARAM1      SINE,100
GPARAM2      SINE,100
GPARAM3      SINE,100
GPARAM4      SINE,100
GP21         80.00 %
GP22         20.10 %
GP23         11.00 %
GP24         -5.00 %
P16          1000.00 usec
P19          500.00 usec
ND0          2
TD            1024
SFO1          201.2205 MHz
FIDRES        29.503399 Hz
SW            150.141 ppm
FMODE        Echo-AntiEcho
SI            1048
SF            800.1800221 MHz
WDM          QSINE
SDB          0.00 Hz
GB           0
PC            1.40
SI            2046
MC2          echo-antiEcho
SF            201.2201871 MHz
WDM          QSINE
SDB          0.00 Hz
GB           0
  
```

2D  $^{13}\text{C}$ -HSQC spectrum of **13** in  $\text{CD}_3\text{OD}$  at  $25^\circ\text{C}$ . The horizontal and vertical axes display  $^1\text{H}$  and  $^{13}\text{C}$  chemical shifts, respectively. The black cross-peaks correspond to  $\text{CH}_3$  and  $\text{CH}$  groups, the red cross-peaks correspond to  $\text{CH}_2$  groups.

Compound 13

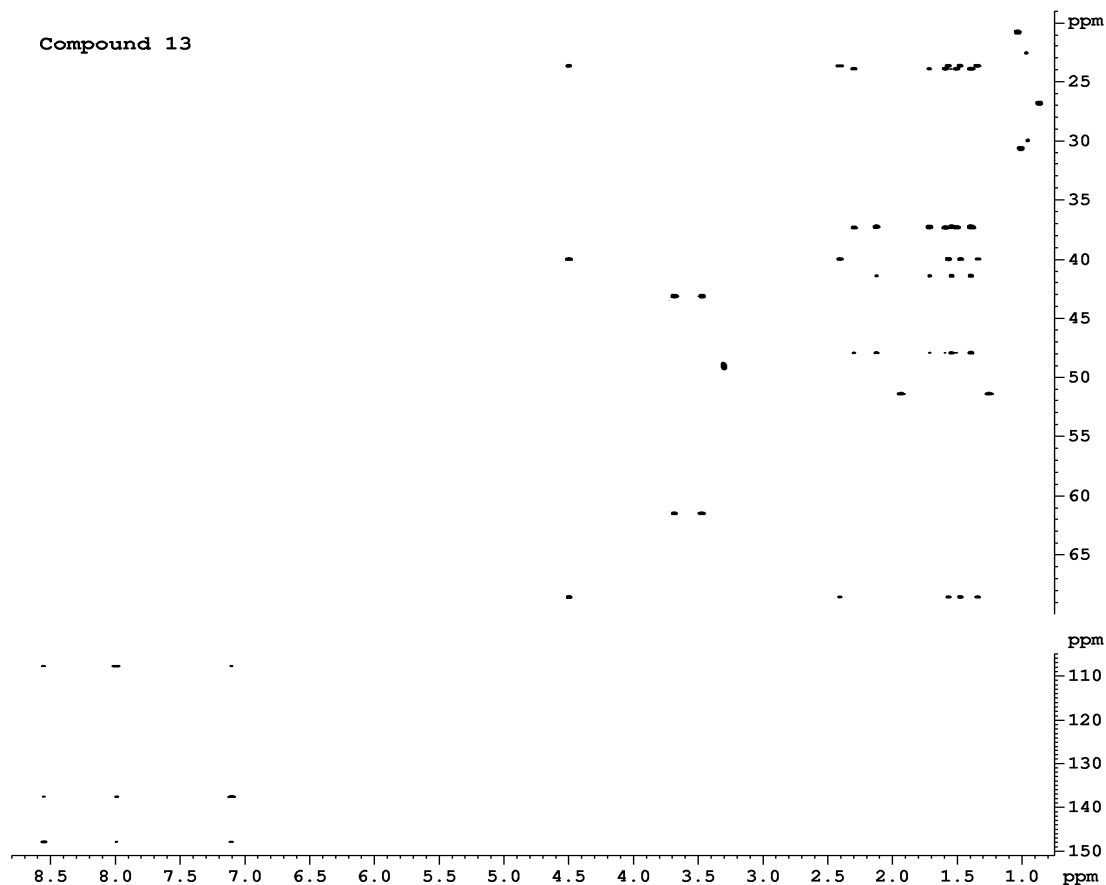

```

NAME          Compound 13
EXPNO         5
PROCNO        1
Date_         20091115
Time          5.50
INSTRUM       spect
PROBHD        5 mm CPTCI 1H-
PULPROG       hzgdcletqz4p.2
TD            1024
SOLVENT       MeOD
NS            32
DS            2
SHE          8223.685 Hz
FIDRES       0.030762 Hz
AQ           0.4983025 sec
RG           2300
DW           60.400 usec
DE           30.00 usec
TE           301.3 K
CNS117       -0.5000000
CNS12        149.0000000
d0           0.00000000 sec
d1           1.50000000 sec
d11          0.00000000 sec
d16          0.00020000 sec
d19         0.00086200 sec
d4           0.00172414 sec
d9           0.00000000 sec
DELTA        0.00122240 sec
DELTA1       0.00120800 sec
DELTA2       0.00147014 sec
DELTA3       0.00135800 sec
FACTOR1      11
INO          0.00001655 sec
l1           22
ST1CNT       0

===== CHANNEL f1 =====
NUC1          13
P1           10.20 usec
P2           20.40 usec
P28          1000.00 usec
P6           24.00 usec
PL1          0.20 dB
PL10         7.63 dB
SFO1         800.1338676 MHz

===== CHANNEL f2 =====
CPDPRG2      P5eap180
NUC2          13C
P14          500.00 usec
P24          2000.00 usec
P3           34.00 usec
PCPD2        1800.00 usec
P201         120.00 dB
PL12         10.00 dB
PL2          -2.00 dB
SFO2         201.2205114 MHz
SP3          1.08 dB
SP7          1.08 dB
SPNAM15      Crp, 80, 1.5, 10, nd
SPNAM3       Crp80, 0.3, 10, 1
SPNAM7       Crp80comp.4
SPNAM15      0.500
SPNAM17      0.500
SPNAM19      0.500
SPNAM17      0.500
SPOFFS15     0.00 Hz
SPOFFS3       0.00 Hz
SPOFFS7       0.00 Hz

===== GRADIENT CHANNEL =====
GPNAM1       SINE.100
GPNAM2       SINE.100
GP21         80.00 %
GP22         20.10 %
P16          1000.00 usec
ND0          2
SFO1         201.2205 MHz
FIDRES       29.503399 Hz
SW           150.141 PPM
FMOD         Echo-Antiecho
SI           2048
SF           800.1800213 MHz
WDM          QSINE
SSB          0.00 Hz
GB           0
PC           1.00
SI           2048
MC2          echo-Antiecho
SF           201.2205170 MHz
WDM          QSINE
SSB          0.00 Hz
GB           0
  
```

2D  $^{13}\text{C}$ -HSQC-TOCSY spectrum of **13** in  $\text{CD}_3\text{OD}$  at  $25^\circ\text{C}$ . The horizontal and vertical axes display  $^1\text{H}$  and  $^{13}\text{C}$  chemical shifts, respectively.

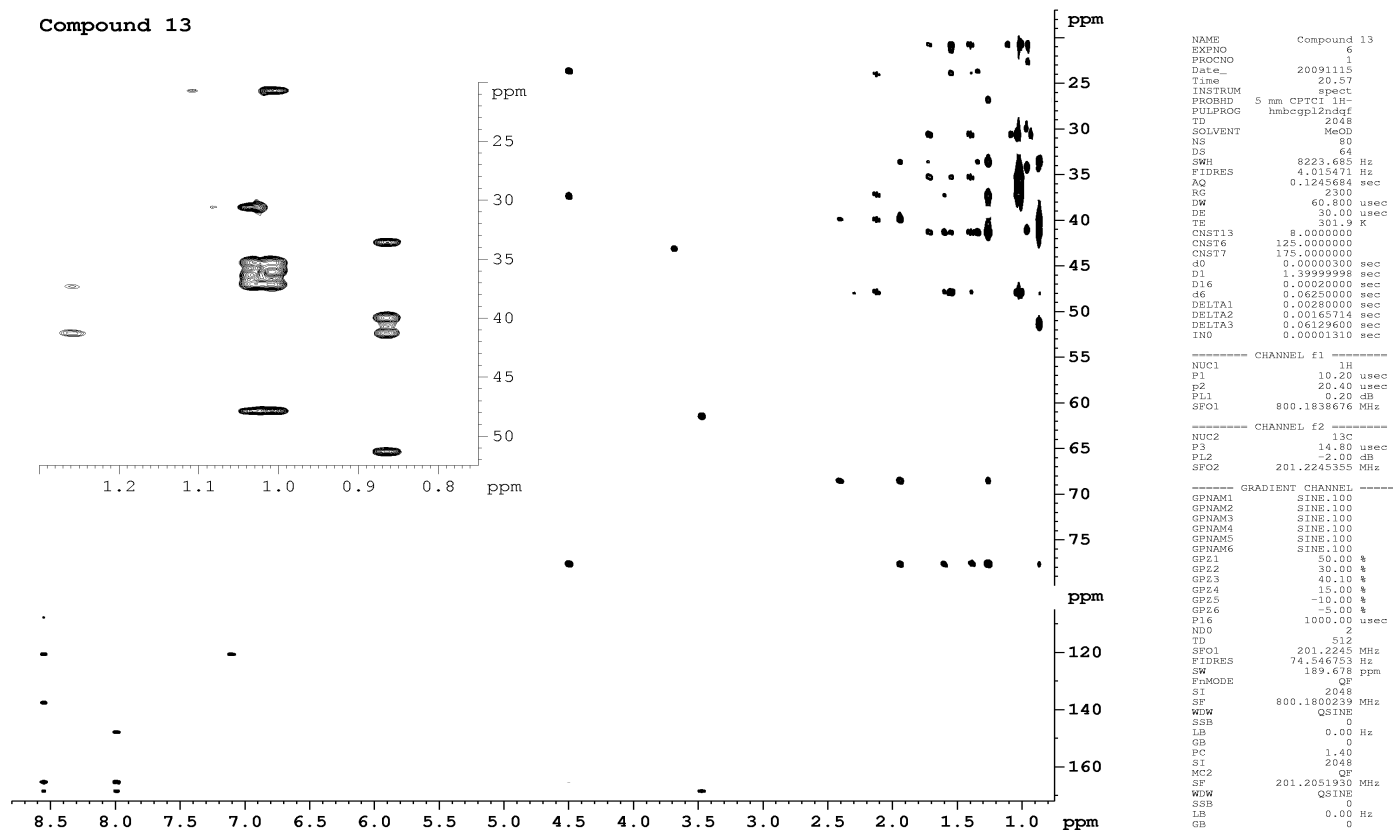

2D  $^{13}\text{C}$ -HMBC spectrum of **13** in  $\text{CD}_3\text{OD}$  at  $25^\circ\text{C}$ . The horizontal and vertical axes display  $^1\text{H}$  and  $^{13}\text{C}$  chemical shifts, respectively. The insert in the upper left corner represents an expansion of the high field region plotted with reduced cross-peaks intensities for a better clarity.

Compound 16

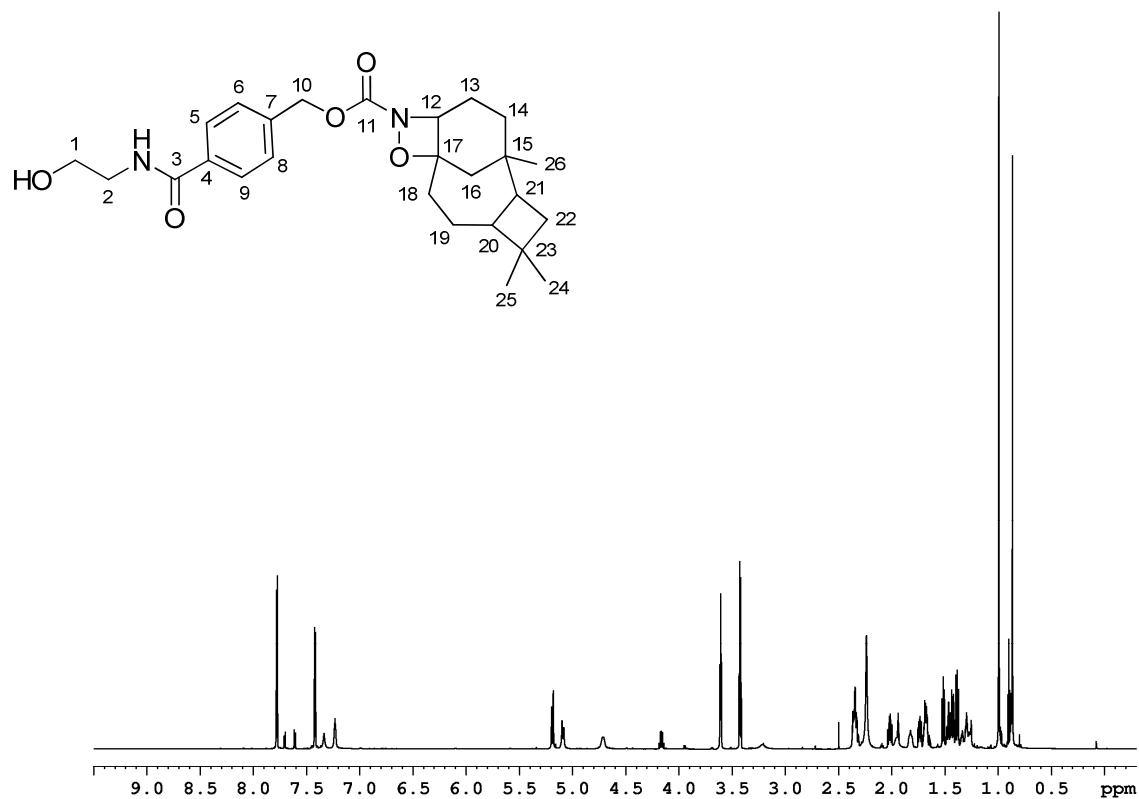

```
NAME          Compound 16
EXPNO          1
PROCNO         1
Date_         20091123
Time           9.15
INSTRUM       spect
PROBHD        5 mm CPTCI 1H-
PULPROG       zg
TD            65536
SOLVENT       CD3CN
NS            128
DS            4
SWH           8223.685 Hz
FIDRES        0.125483 Hz
AQ            3.9846387 sec
RG            32
DW            60.800 usec
DE            30.00 usec
TE            280.0 K
D1            0.10000000 sec
TD0           1
```

```
===== CHANNEL f1 =====
NUC1           1H
P1             8.40 usec
PL1            0.20 dB
SFO1          800.1837640 MHz
SI            131072
SF            800.1800262 MHz
WDW            no
SSB            0
LB             0.00 Hz
GB             0
PC             1.00
```

<sup>1</sup>H spectrum of **16** in CD<sub>3</sub>CN at 25° C.

|                               |                 |                             |             |                               |             |                        |             |
|-------------------------------|-----------------|-----------------------------|-------------|-------------------------------|-------------|------------------------|-------------|
| <b>Acquisition Time (sec)</b> | 1.7826          | <b>Comment</b>              | Compound 16 | <b>Date</b>                   | May 27 2009 | <b>Date Stamp</b>      | May 27 2009 |
|                               |                 |                             |             |                               |             | <b>Frequency (MHz)</b> | 150.85      |
| <b>Nucleus</b>                | <sup>13</sup> C | <b>Number of Transients</b> | 256         | <b>Original Points Count</b>  | 65536       | <b>Points Count</b>    | 65536       |
| <b>Pulse Sequence</b>         | s2pul           | <b>Receiver Gain</b>        | 60.00       | <b>Solvent</b>                | METHANOL-d4 |                        |             |
| <b>Spectrum Offset (Hz)</b>   | 15838.1133      | <b>Sweep Width (Hz)</b>     | 36764.71    | <b>Temperature (degree C)</b> | 22.000      |                        |             |

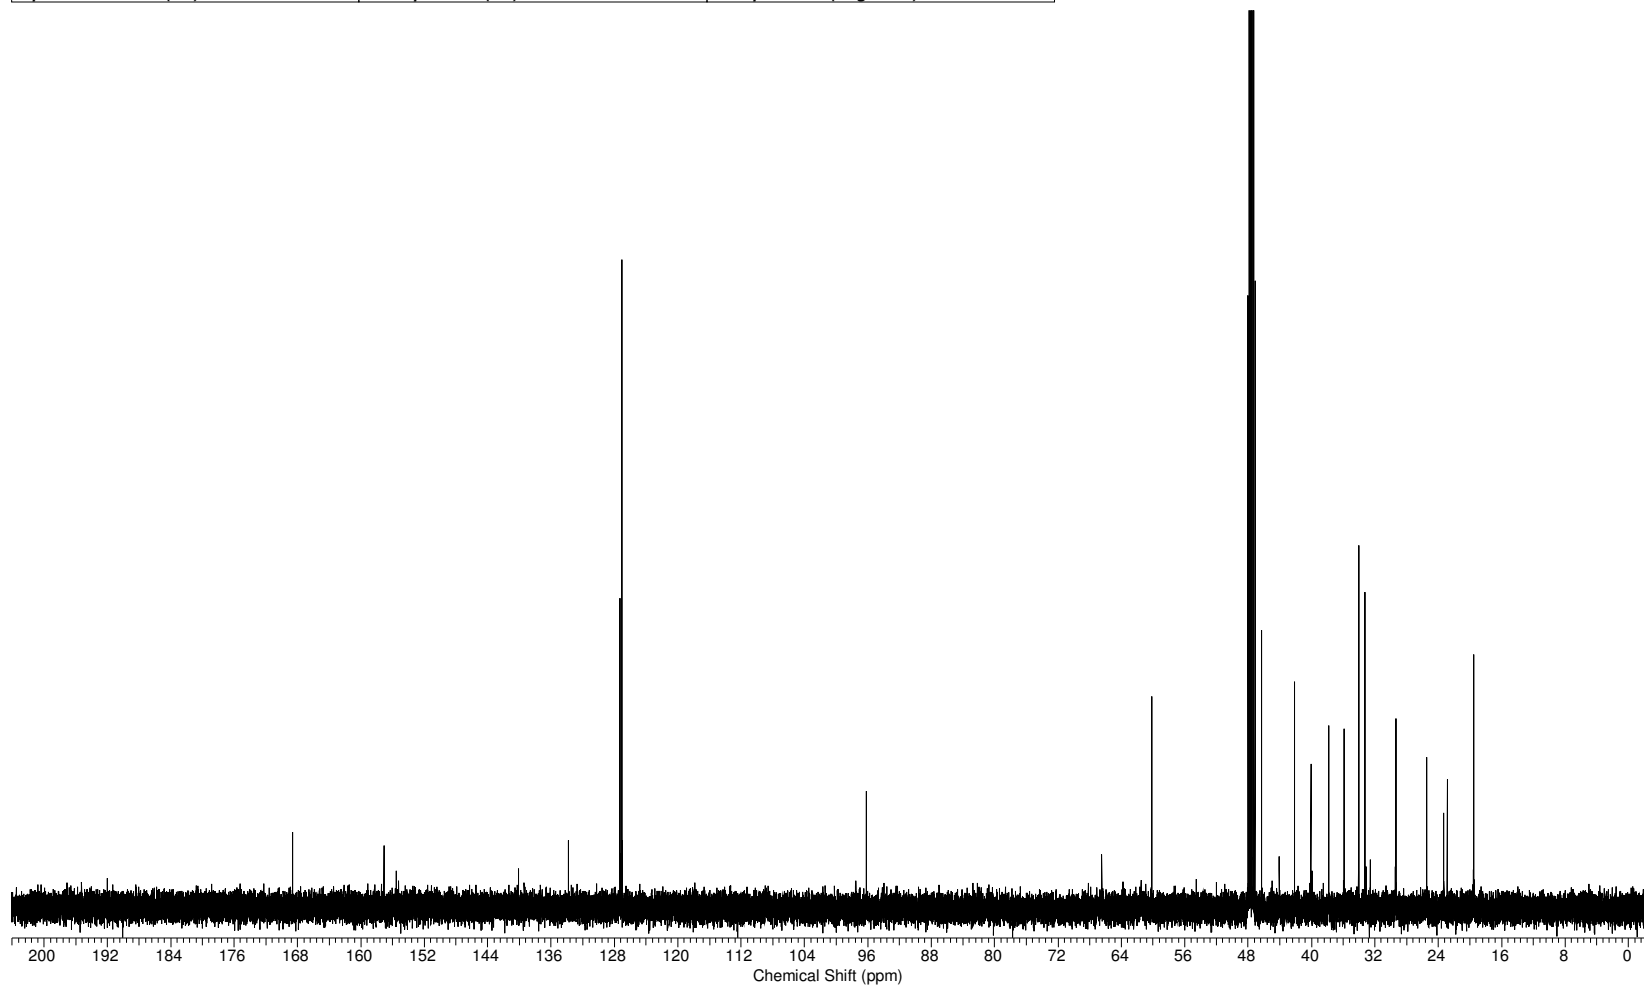

<sup>13</sup>C{<sup>1</sup>H} spectrum of **16** in CD<sub>3</sub>OD at 25° C.



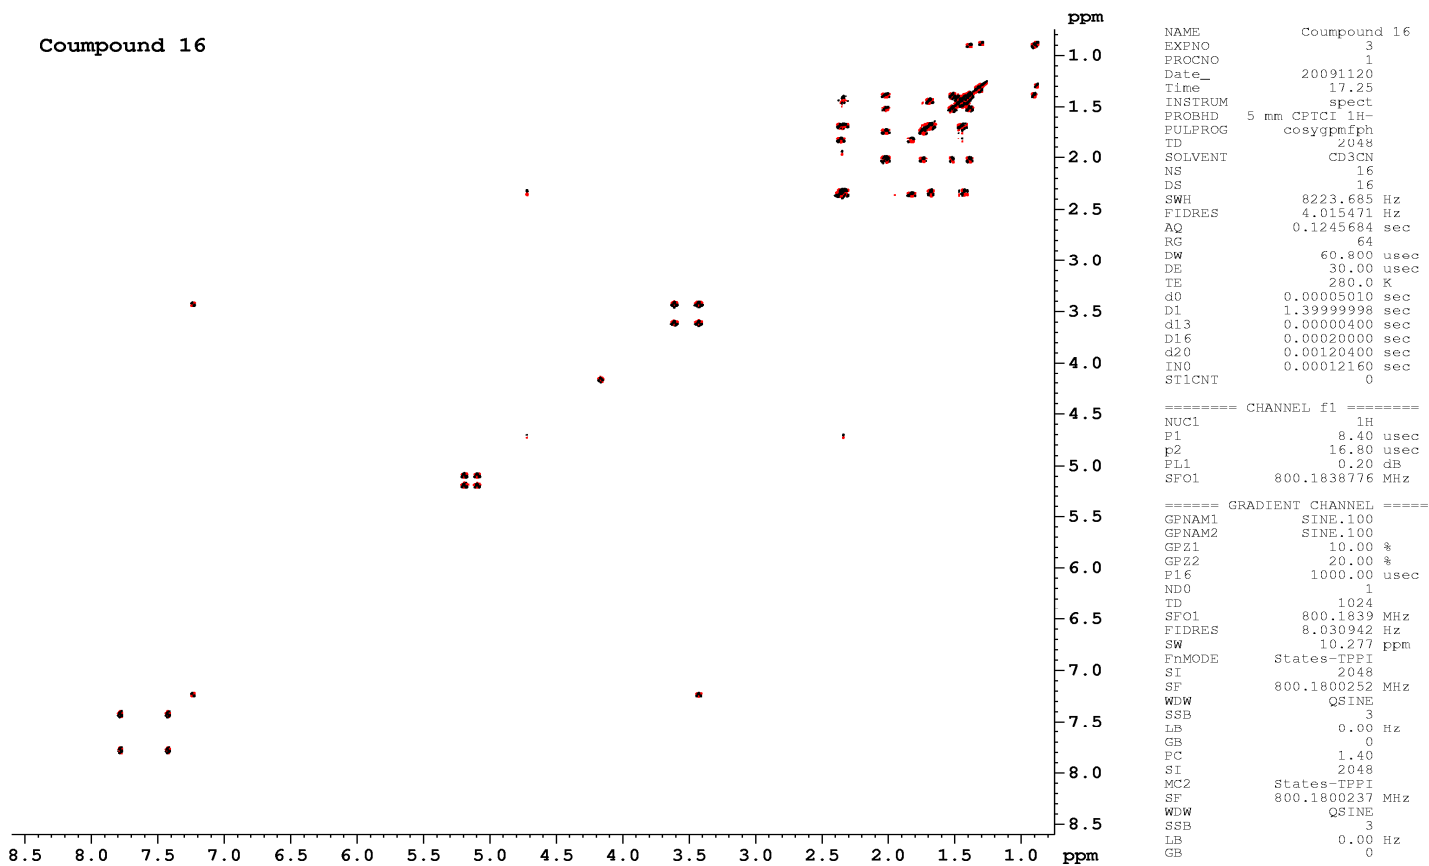

2D DQF-COSY spectrum of **16** in CD<sub>3</sub>CN at 25° C. The black and red contours represent positive and negative peaks, respectively.

Compound 16

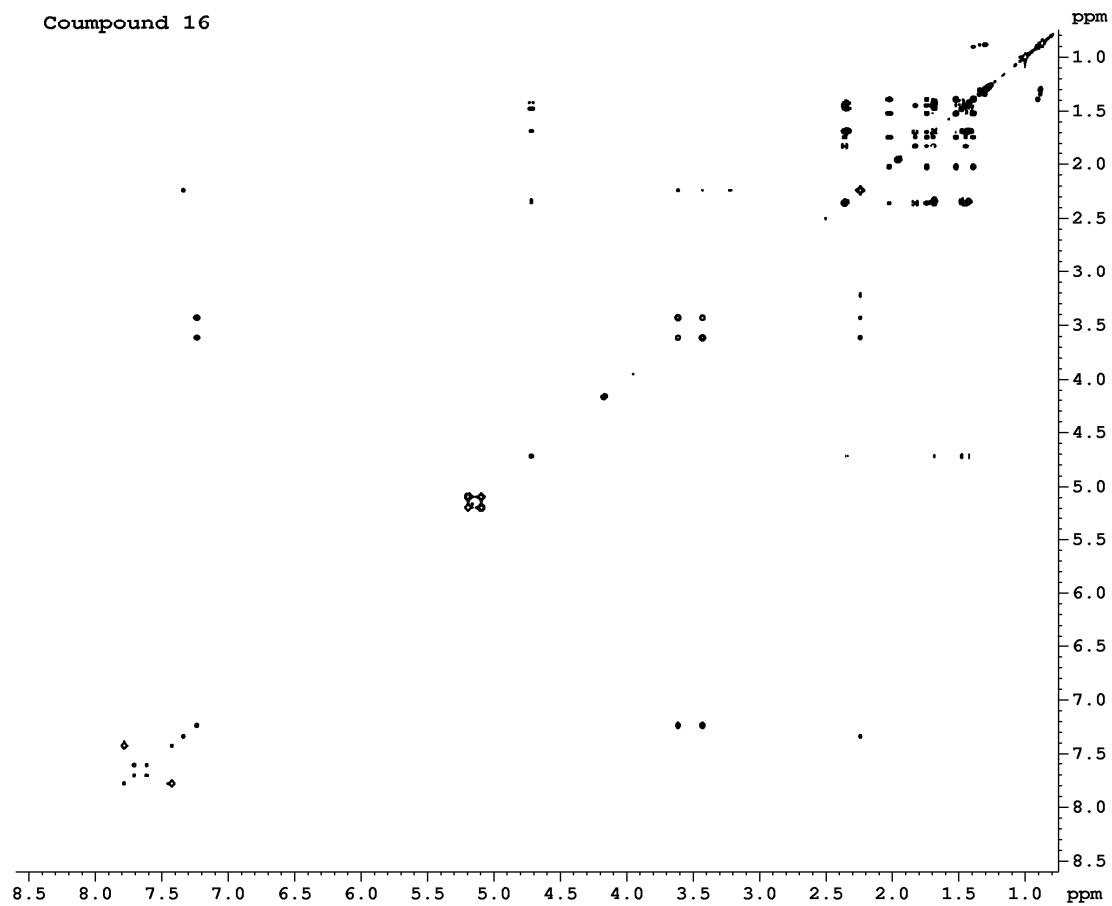

```

NAME          Compound 16
EXPNO         4
PROCNO        1
Date_         20091121
Time          0.32
INSTRUM       spect
PROBHD        5 mm CPTCI 1H-
PULPROG       dipssi2etgpsi
TD            2048
SOLVENT       CD3CN
NS            16
DS            16
SWH           8223.685 Hz
FIDRES        4.015471 Hz
AQ            0.1245684 sec
RG            64
DW            60.800 usec
DE            30.00 usec
TE            280.0 K
d0            0.00000300 sec
D1            1.39999998 sec
d11           0.03000000 sec
D16           0.00020000 sec
D20           0.00001000 sec
D21           0.00001000 sec
D9            0.06000000 sec
DELTA         0.00120300 sec
DELTA1        0.00120800 sec
FACTOR1       11
l1            22
INO           0.00012160 sec
STICNT        0

===== CHANNEL f1 =====
NUC1          1H
P1            8.40 usec
P2            16.80 usec
P6            24.00 usec
PL1           0.20 dB
PL10          9.32 dB
SFO1          800.1838676 MHz

===== GRADIENT CHANNEL =====
GPNAM1        SINE.100
GPNAM2        SINE.100
GPZ1          30.00 %
GPZ2          30.00 %
P16           1000.00 usec
ND0           1
TD            1024
SFO1          800.1839 MHz
FIDRES        8.030942 Hz
SW            10.277 ppm
FnMODE        Echo-Antiecho
SI            2048
SF            800.1800240 MHz
WDW           QSINE
SSB           2
LB            0.00 Hz
GB            0
PC            1.40
SI            2048
MC2           echo-antiecho
SF            800.1800239 MHz
WDW           QSINE
SSB           2
LB            0.00 Hz
GB            0
    
```

2D TOCSY spectrum of **16** in CD<sub>3</sub>CN at 25° C.

Compound 16

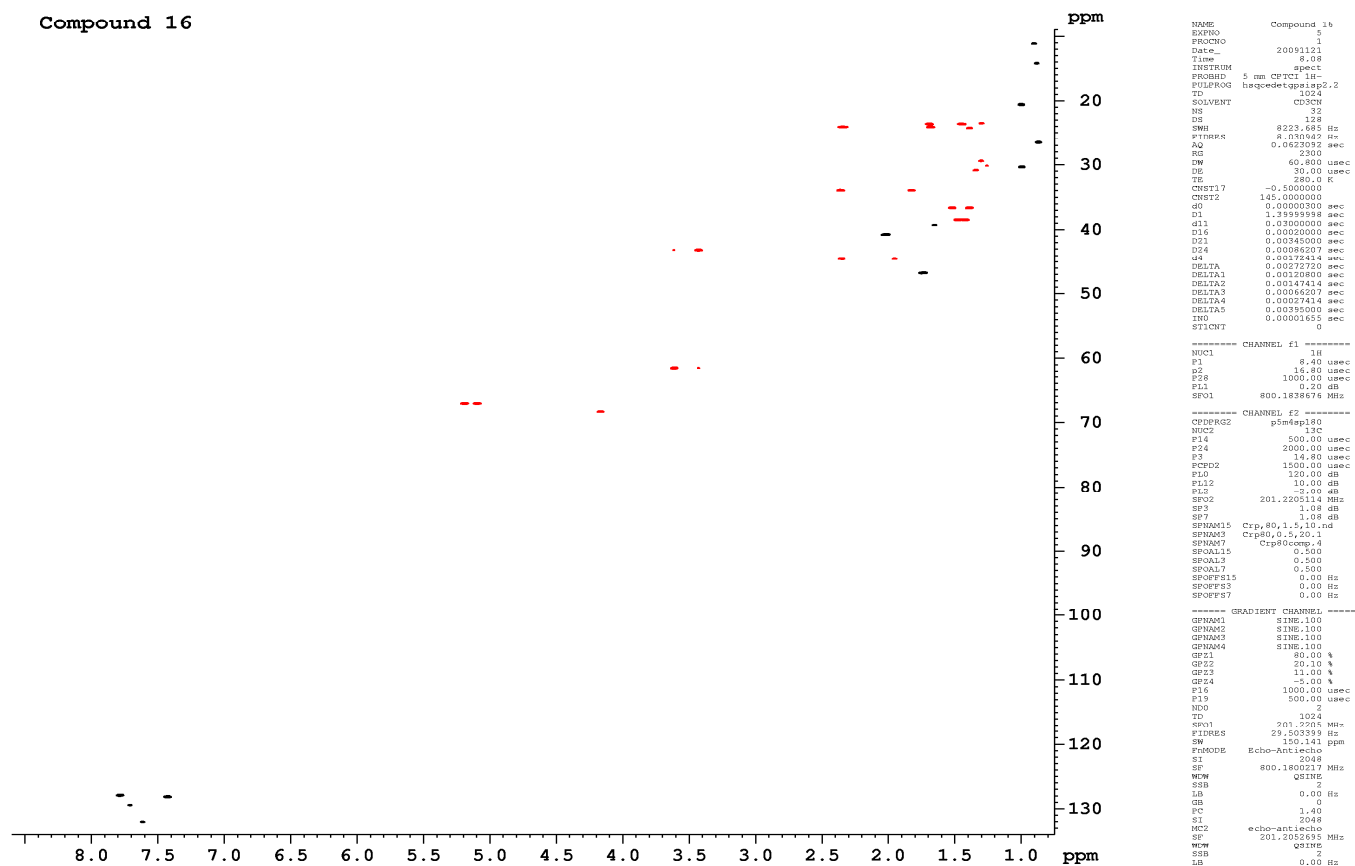

2D  $^{13}\text{C}$ -HSQC spectrum of **16** in  $\text{CD}_3\text{CN}$  at  $25^\circ\text{C}$ . The horizontal and vertical axes display  $^1\text{H}$  and  $^{13}\text{C}$  chemical shifts, respectively. The black cross-peaks correspond to  $\text{CH}_3$  and  $\text{CH}$  groups, the red cross-peaks correspond to  $\text{CH}_2$  groups.

Compound 16

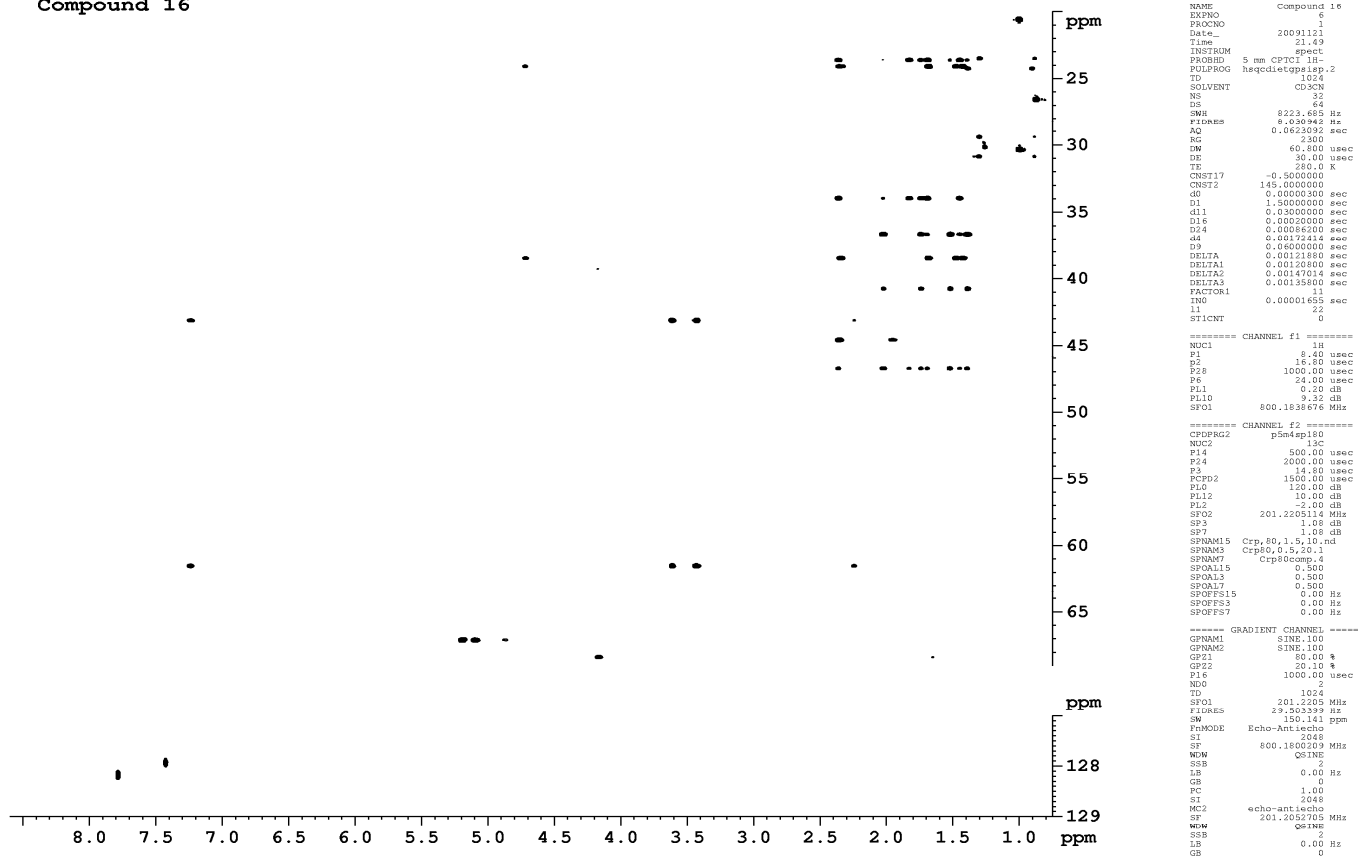

2D  $^{13}\text{C}$ -HSQC-TOCSY spectrum of **16** in  $\text{CD}_3\text{CN}$  at  $25^\circ\text{C}$ . The horizontal and vertical axes display  $^1\text{H}$  and  $^{13}\text{C}$  chemical shifts, respectively.

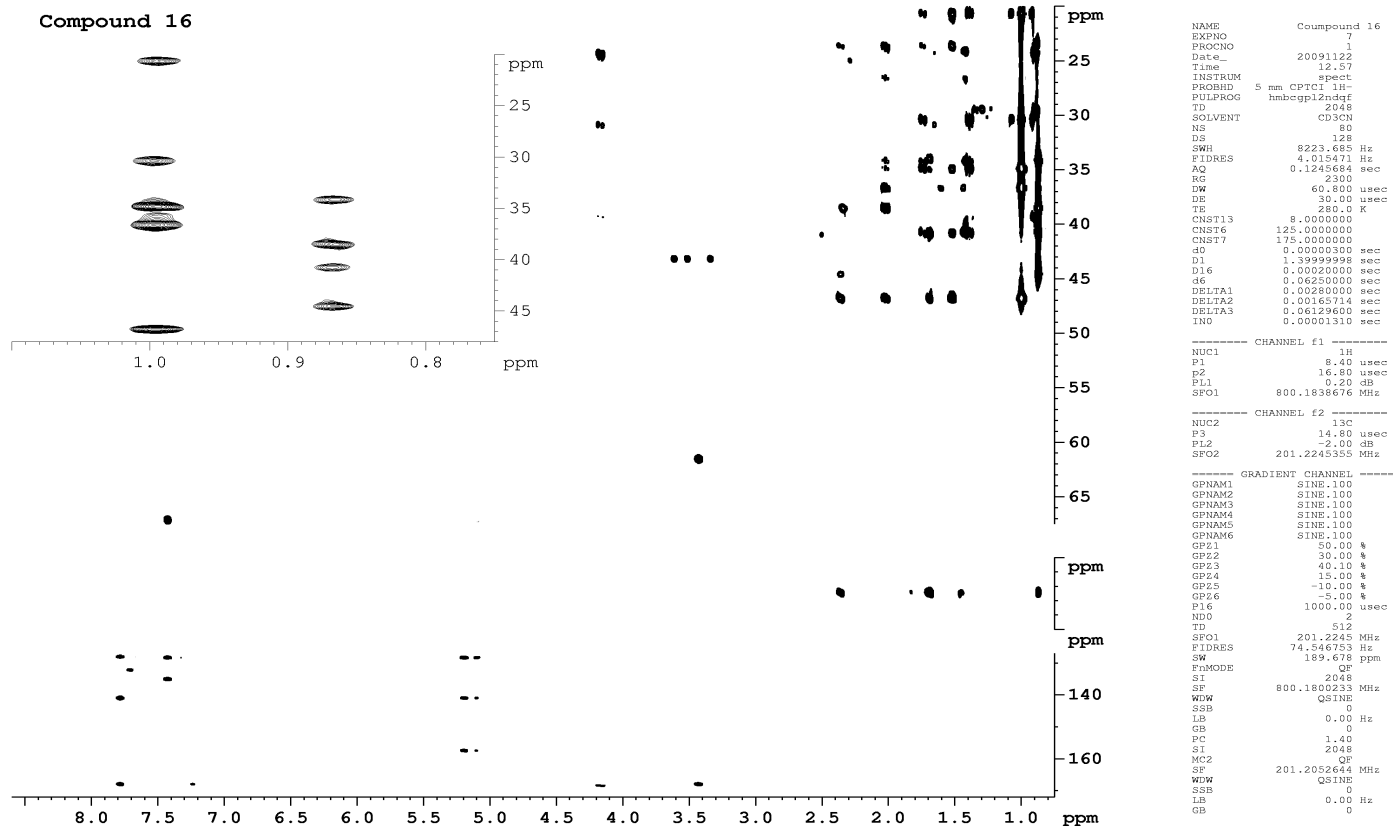

2D  $^{13}\text{C}$ -HMBC spectrum of **16** in  $\text{CD}_3\text{CN}$  at  $25^\circ\text{C}$ . The horizontal and vertical axes display  $^1\text{H}$  and  $^{13}\text{C}$  chemical shifts, respectively. The insert in the upper left corner represents an expansion of the high field region plotted with reduced cross-peaks intensities for a better clarity.

Compound 17

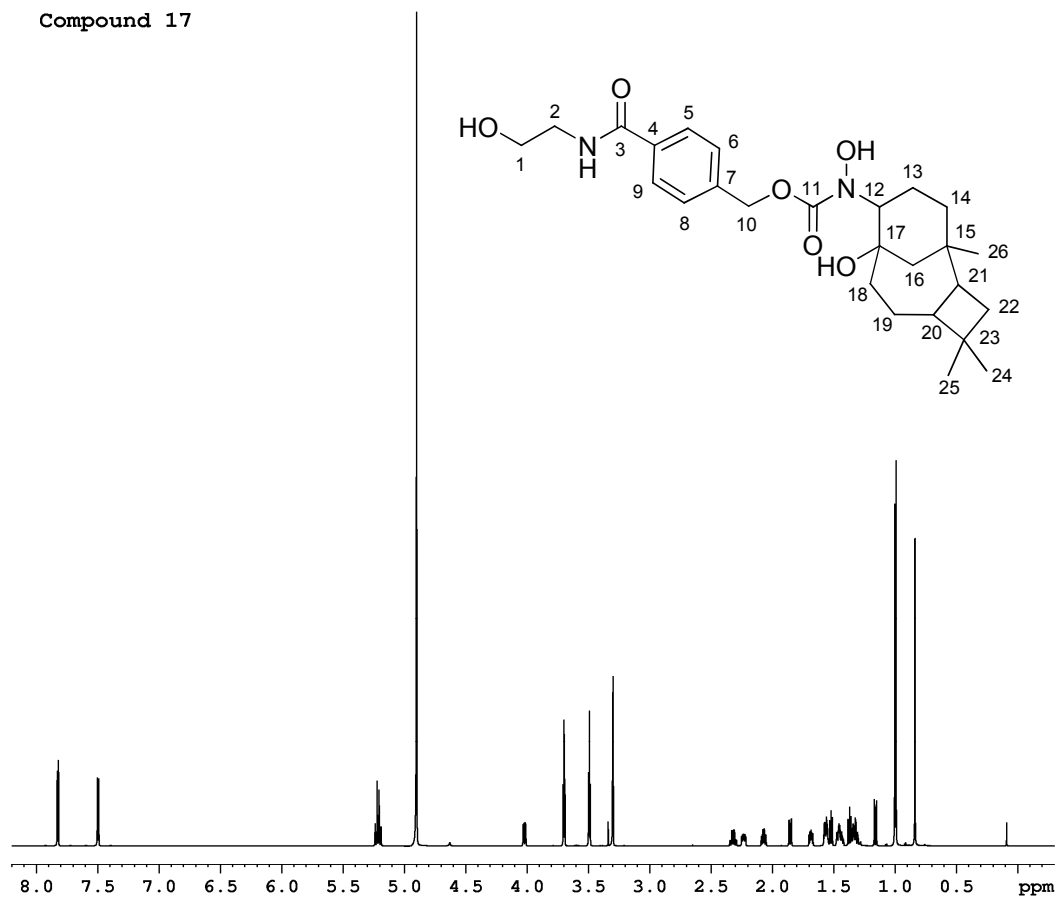

```

NAME          Coumpound 17
EXPNO         1
PROCNO        1
Date_         20091023
Time          15.28
INSTRUM       spect
PROBHD        5 mm CPTCI 1H-
PULPROG       zg
TD            65536
SOLVENT       MeOD
NS            128
DS            4
SWH           8223.685 Hz
FIDRES        0.125483 Hz
AQ            3.9846387 sec
RG            71.8
DW            60.800 usec
DE            30.00 usec
TE            295.0 K
D1            0.10000000 sec
TD0           1
    
```

```

===== CHANNEL f1 =====
NUC1          1H
P1            10.30 usec
PL1           0.20 dB
SFO1          800.1837640 MHz
SI            131072
SF            800.1800265 MHz
WDW           no
SSB           0
LB            0.00 Hz
GB            0
PC            1.00
    
```

<sup>1</sup>H spectrum of 17 in CD<sub>3</sub>OD at 25° C.

Compound 17

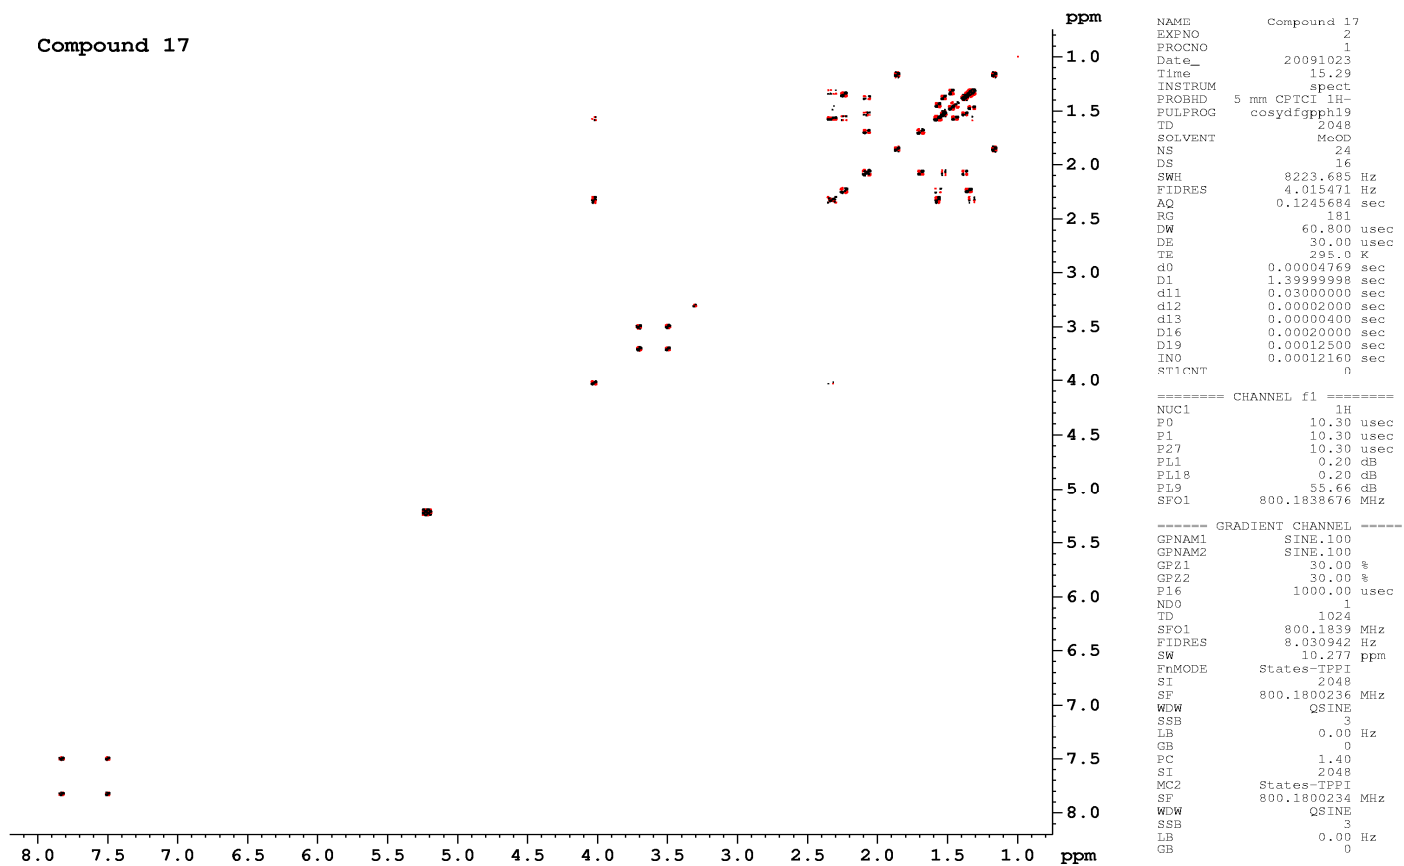

2D DQF-COSY spectrum of **17** in CD<sub>3</sub>OD at 25° C. The black and red contours represent positive and negative peaks, respectively.

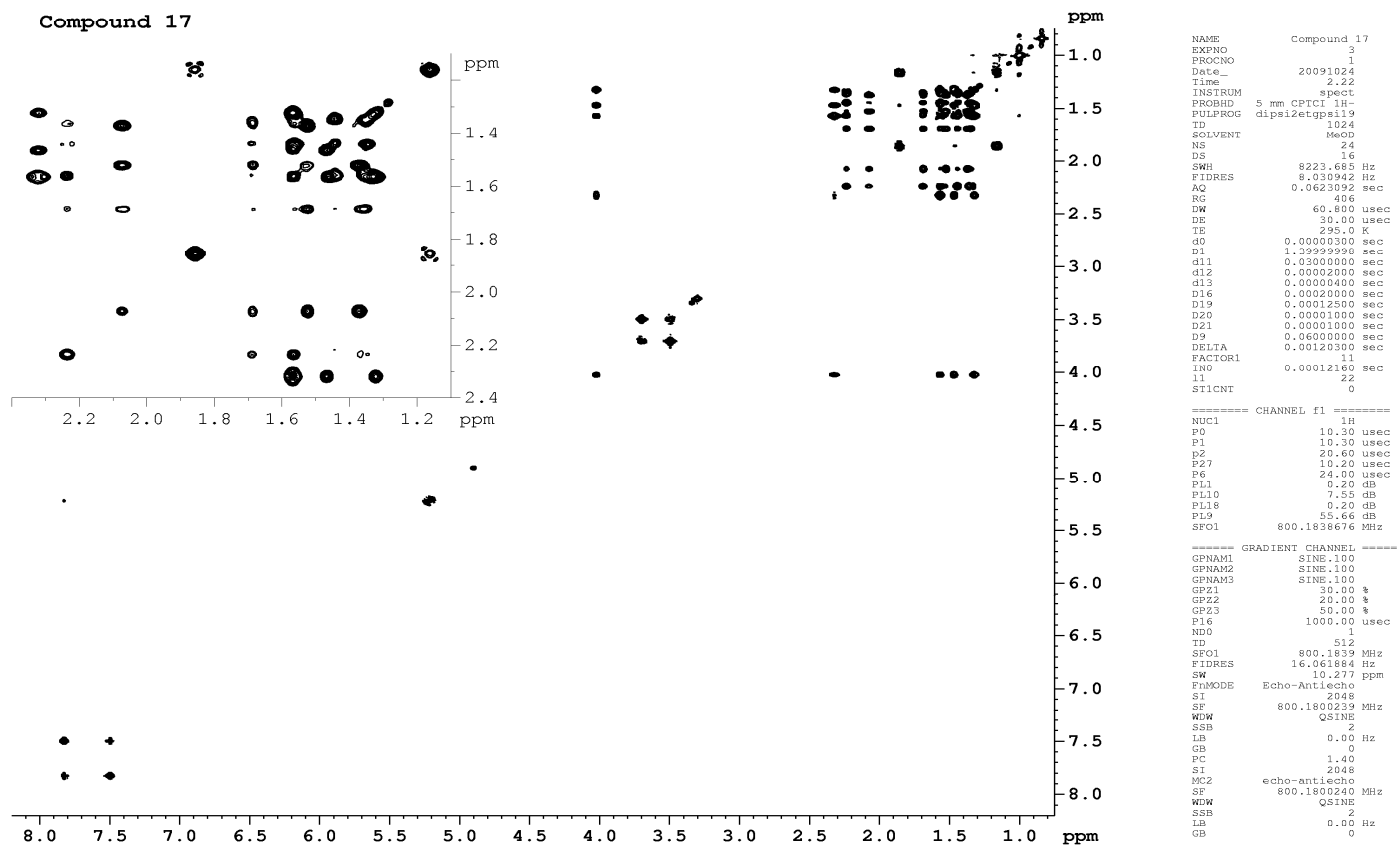

2D TOCSY spectrum of **17** in CD<sub>3</sub>OD at 25<sup>o</sup> C. The insert in the upper left corner represents an expansion of the high field region plotted with reduced cross-peaks intensities for a better clarity.



Compound 17

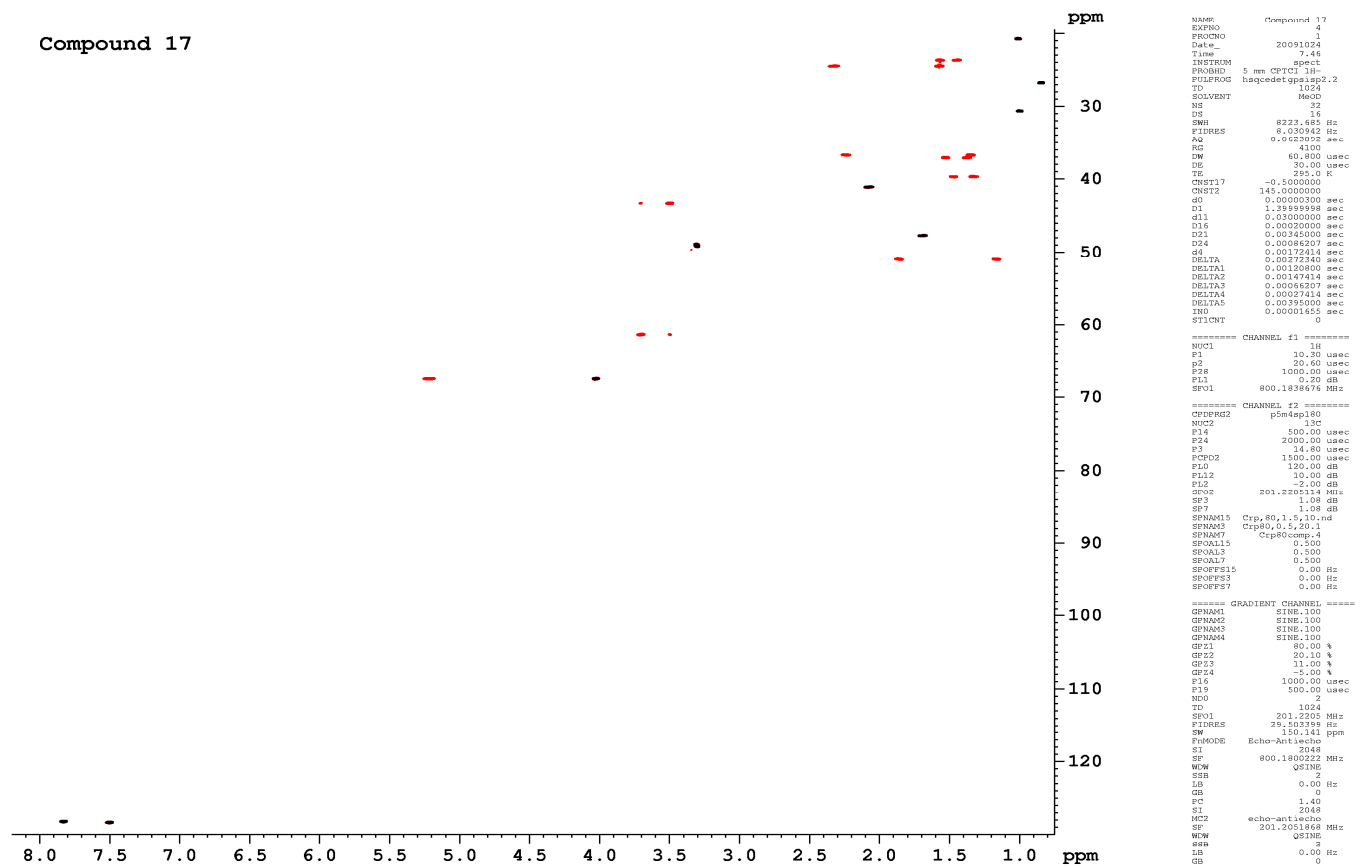

```

NAME Compound 17
EXPNO 4
PROCNO 1
DATE_ 20091024
TIME 7:46
INSTRUM spect
PROBHD 5 mm CPYCO 1H-
PULPROG zgpg30p2.2
TD 1024
SOLVENT MeOD
NS 32
DS 16
SWH 8223.685 Hz
FIDRES 0.020942 Hz
AQ 0.002023 sec
RG 4100
DW 60.800 usec
DE 30.00 usec
TE 300.0 K
CONST17 -0.5000000
CONST2 145.0000000
d0 0.0000000 sec
d1 1.3999999 sec
d11 0.0300000 sec
d16 0.0000000 sec
d21 0.0034500 sec
d24 0.0008207 sec
d3 0.0017214 sec
DELTA 0.0027340 sec
DELTA1 0.0010900 sec
DELTA2 0.0014714 sec
DELTA3 0.0008207 sec
DELTA4 0.0027414 sec
DELTA5 0.0000000 sec
IN0 0.0001655 sec
SFOFF 0
===== CHANNEL f1 =====
NUC1 1H
P1 10.00 usec
P2 20.60 usec
P3 1000.00 usec
PL1 0.00 dB
PL2 0.00 dB
PL3 0.00 dB
PL4 0.00 dB
PL5 0.00 dB
PL6 0.00 dB
PL7 0.00 dB
PL8 0.00 dB
PL9 0.00 dB
PL10 0.00 dB
PL11 0.00 dB
PL12 0.00 dB
PL13 0.00 dB
PL14 0.00 dB
PL15 0.00 dB
PL16 0.00 dB
PL17 0.00 dB
PL18 0.00 dB
PL19 0.00 dB
PL20 0.00 dB
PL21 0.00 dB
PL22 0.00 dB
PL23 0.00 dB
PL24 0.00 dB
PL25 0.00 dB
PL26 0.00 dB
PL27 0.00 dB
PL28 0.00 dB
PL29 0.00 dB
PL30 0.00 dB
PL31 0.00 dB
PL32 0.00 dB
PL33 0.00 dB
PL34 0.00 dB
PL35 0.00 dB
PL36 0.00 dB
PL37 0.00 dB
PL38 0.00 dB
PL39 0.00 dB
PL40 0.00 dB
PL41 0.00 dB
PL42 0.00 dB
PL43 0.00 dB
PL44 0.00 dB
PL45 0.00 dB
PL46 0.00 dB
PL47 0.00 dB
PL48 0.00 dB
PL49 0.00 dB
PL50 0.00 dB
PL51 0.00 dB
PL52 0.00 dB
PL53 0.00 dB
PL54 0.00 dB
PL55 0.00 dB
PL56 0.00 dB
PL57 0.00 dB
PL58 0.00 dB
PL59 0.00 dB
PL60 0.00 dB
PL61 0.00 dB
PL62 0.00 dB
PL63 0.00 dB
PL64 0.00 dB
PL65 0.00 dB
PL66 0.00 dB
PL67 0.00 dB
PL68 0.00 dB
PL69 0.00 dB
PL70 0.00 dB
PL71 0.00 dB
PL72 0.00 dB
PL73 0.00 dB
PL74 0.00 dB
PL75 0.00 dB
PL76 0.00 dB
PL77 0.00 dB
PL78 0.00 dB
PL79 0.00 dB
PL80 0.00 dB
PL81 0.00 dB
PL82 0.00 dB
PL83 0.00 dB
PL84 0.00 dB
PL85 0.00 dB
PL86 0.00 dB
PL87 0.00 dB
PL88 0.00 dB
PL89 0.00 dB
PL90 0.00 dB
PL91 0.00 dB
PL92 0.00 dB
PL93 0.00 dB
PL94 0.00 dB
PL95 0.00 dB
PL96 0.00 dB
PL97 0.00 dB
PL98 0.00 dB
PL99 0.00 dB
PL100 0.00 dB
===== CHANNEL f2 =====
CPDPRG2 pSine40.80
NUC2 13C
P14 500.00 usec
P24 2000.00 usec
P3 141.80 usec
PCPD2 1500.00 usec
P10 150.00 dB
P12 10.00 dB
P13 -2.00 dB
P14 201.2205 MHz
P15 1.08 dB
P16 1.08 dB
SPAN15 Cfg, 80, 1, 6, 10, nd
SPAN25 Cfg, 0, 1, 2, 20, 1
SPAN7 Cfg, 80, 0, 4
SFOFF15 0.500
SFOFF25 0.500
SFOFF7 0.00 Hz
SFOFF15 0.00 Hz
SFOFF25 0.00 Hz
SFOFF7 0.00 Hz
===== GRADIENT CHANNEL =====
GPNAM1 SINE.100
GPNAM2 SINE.100
GPNAM3 SINE.100
GPNAM4 SINE.100
GP21 80.00 %
GP22 20.10 %
GP23 11.00 %
GP24 -2.00 %
P16 1000.00 usec
P15 500.00 usec
ND0 2
TD 1024
SFO1 201.2205 MHz
FIDRES 29.503399 Hz
SW 150.141 ppm
F2MODE Echo-AntiEcho
SI 2048
SF 800.1809222 MHz
WVW GSIW
SSB 2
LB 0.00 Hz
GB 0
FC 1.40
SI 2048
F2MODE Echo-AntiEcho
SF 201.2051868 MHz
WVW GSIW
SSB 2
LB 0.00 Hz
GB 0

```

2D <sup>13</sup>C-HSQC spectrum of **17** in CD<sub>3</sub>OD at 25° C. The horizontal and vertical axes display <sup>1</sup>H and <sup>13</sup>C chemical shifts, respectively. The black cross-peaks correspond to CH<sub>3</sub> and CH groups, the red cross-peaks correspond to CH<sub>2</sub> groups.

Compound 17

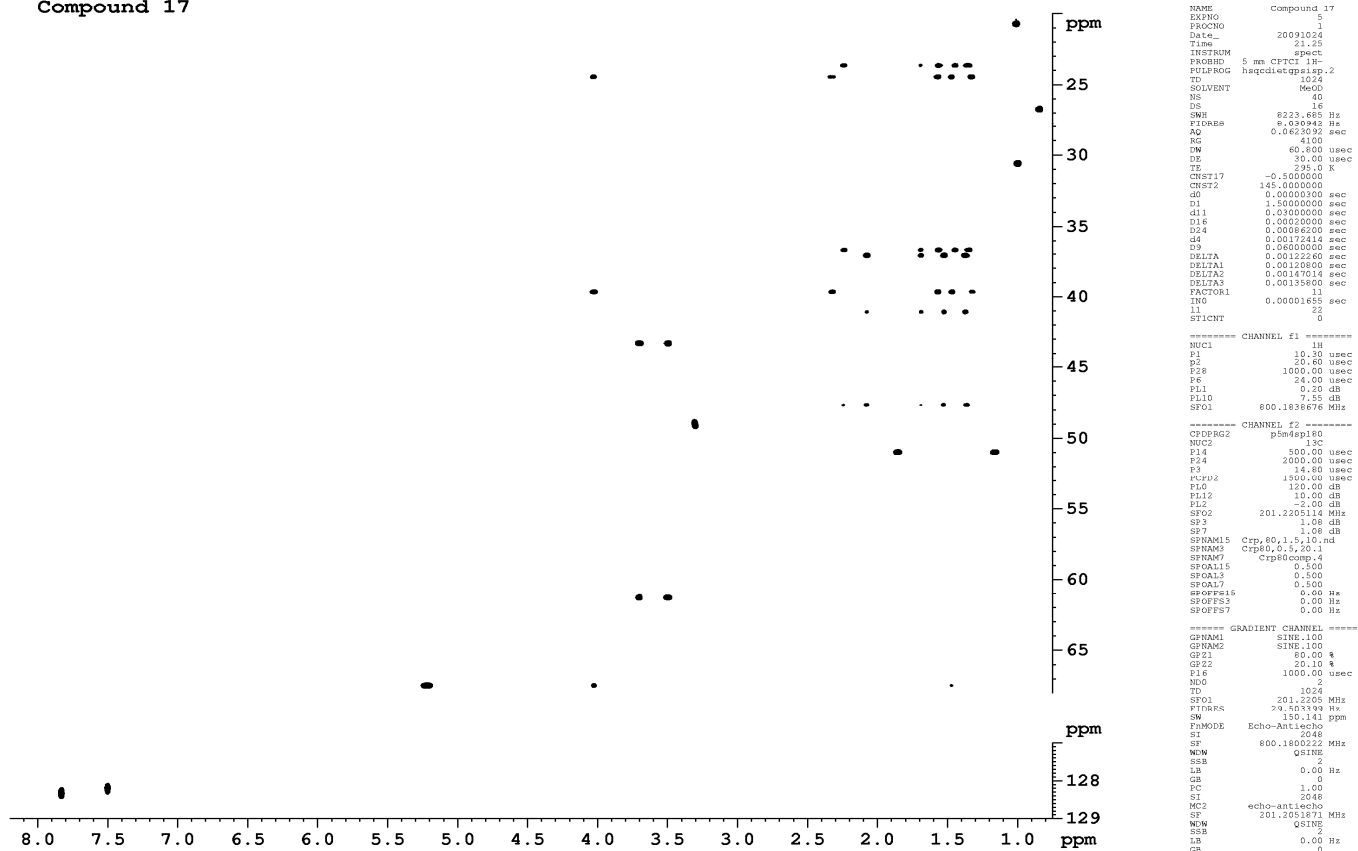

```

NAME          Compound_17
EXPNO         5
PROCNO        1
Date_         2001024
Time          21:25
INSTRUM       spect
PROBHD        5 mm CPTCI 1H-
PULPROG       hsqcletqp3sp.2
TD            1024
SOLVENT       MeOD
NS            40
DS            16
SWH           8222.465 Hz
FIDRES        0.000943 Hz
AQ            0.0623032 sec
RG            4100
DN            60.800 usec
DE            30.00 usec
TE            295.0 K
CNS17         -0.5000000
CNS22         145.0000000
d0            0.0000000 sec
D1            1.5000000 sec
d11           0.0300000 sec
D16           0.0000000 sec
D24           0.00086200 sec
d4            0.00172414 sec
D9            0.00000000 sec
DELTA2        0.00122800 sec
DELTA1        0.00120800 sec
DELTA2A       0.00147014 sec
DELTA2A3      0.00135800 sec
FACTOR1       11
IND           22
L1            0
STICNT        0

----- CHANNEL f1 -----
NUC1          1H
P1            10.10 usec
P2            20.60 usec
P28           1000.00 usec
P6            24.00 usec
PL1           0.20 dB
PL10          7.55 dB
SF01          800.1836676 MHz

----- CHANNEL f2 -----
CPOBPG2      p5m4sp160
NUC2          13C
P14           500.00 usec
P24           2000.00 usec
P9            14.80 usec
P17F2        1500.00 usec
PL12          120.00 dB
PL10          10.00 dB
PL2           -2.00 dB
SF02         201.2205114 MHz
SP3           1.08 dB
SP7           1.08 dB
SFXAM15      Crp, 60, 1.5, 10, nd
SFXAM3       Crp0, 0.5, 20, 1
SFXAM7       Crp0comp, 4
SFOAL15      0.500
SFOAL5        0.500
SFOAL7        0.500
SFOFFPS15    0.00 Hz
SFOFFPS3     0.00 Hz
SFOFFPS7     0.00 Hz

----- GRADIENT CHANNEL -----
GPNAM1       SINE, 100
GPNAM2       SINE, 100
GP21         80.00 %
GP22         20.10 %
FILE         1000.00 usec
TD           2
F0           1024
SF01         201.2205 MHz
FTRFPS       20.505599 Hz
SW           150.141 ppm
FMODE        Echo-Anti1echo
SI           2048
SF           800.1800222 MHz
NSW          GSINE
SSB          2
LB           0.00 Hz
GB           0
PC           1.00
SI           2048
MC2          echo-anti1echo
SF           201.2205171 MHz
NSW          GSINE
SSB          2
LB           0.00 Hz
GB           0
    
```

2D  $^{13}\text{C}$ -HSQC-TOCSY spectrum of **17** in  $\text{CD}_3\text{OD}$  at  $25^\circ\text{C}$ . The horizontal and vertical axes display  $^1\text{H}$  and  $^{13}\text{C}$  chemical shifts, respectively.



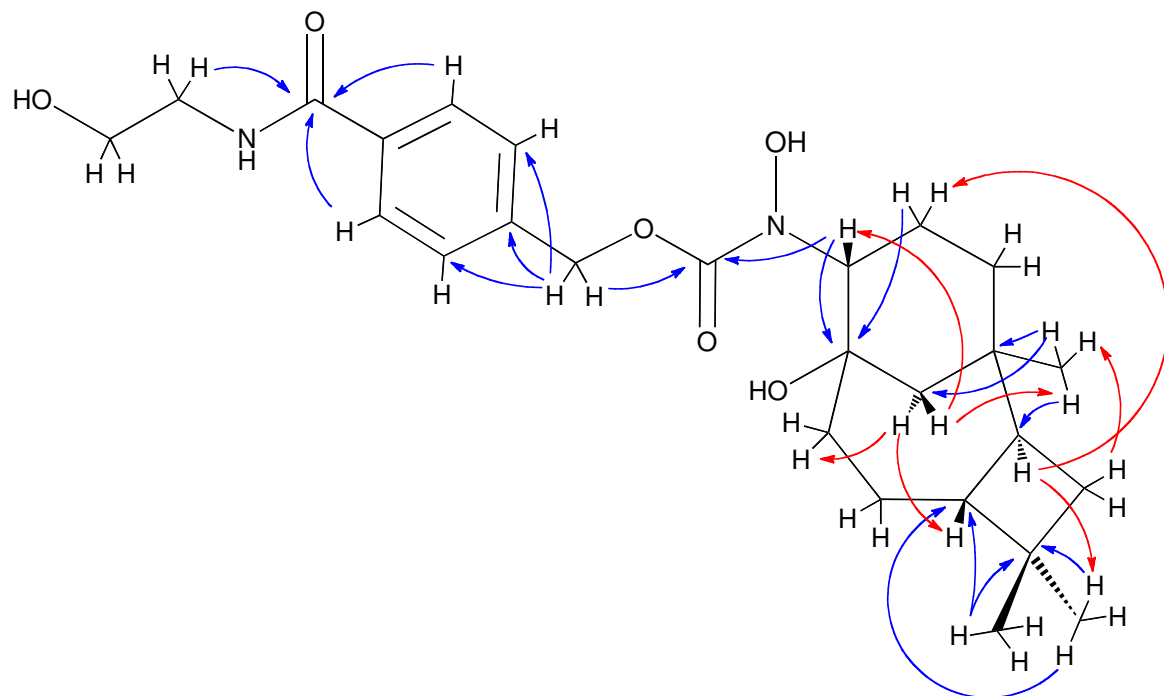

Correlation diagram for compound **17**. The HMBC (in blue) and NOE (in red) correlations, together with proton-proton correlations in the DQF-COSY and TOCSY spectra and one bond proton-carbon correlations in the HSQC spectrum unambiguously establish the proposed structure of compound **17** and conformation of its  $\beta$ -caryophyllene unit (segment).

## References and Notes

1. For a detailed account of this antibiotic susceptibility assay see: Afonin, S.; Glaser, R. W.; Berditchevskaja, M.; Wadhvani, P.; Gührs, K.-H.; Möllmann, U.; Perner, A.; Ulrich, A. S. "4-Fluoro-phenylglycine as a Label for  $^{19}\text{F}$ -NMR Structure Analysis of Membrane Associated Peptides." *ChemBioChem* **2003**, 4, 1151-1163.

2. Murray, P. R.; Baron, E. J.; Tenover, F. C.; Tenover, F. C.; Tenover, F. C.; Yolken, R. H. *Manual of Clinical Microbiology*, 7<sup>th</sup> ed.; American Society for Microbiology: Washington, DC, **1999**.
3. The test organisms *Mycobacterium vaccae* IMET 10670 and *Mycobacterium smegmatis* mc<sup>2</sup>155 required longer incubation times for overnight LB cultures (24-48 hours) and were used in the agar diffusion assay directly from the LB culture broth without dilution and standardization. The test organism *Bacillus subtilis* ATCC 6633 was used in the agar diffusion assay directly from the LB culture broth without dilution and standardization.
4. Snapper, S. B.; Melton, R. E.; Mustafa, S.; Kieser, T.; Jacobs, W. R. "Isolation and Characterization of Efficient Plasmid Transformation Mutants of *Mycobacterium smegmatis*." *Mol. Microbiol.* **1990**, *4*, 1911-1919.
5. Zimmermann, W. "Penetration of  $\beta$ -Lactam Antibiotics into their Target Enzymes in *Pseudomonas aeruginosa*: Comparison of a Highly Sensitive Mutant with its Parent Strain." *Antimicrob. Agents Chemother.* **1980**, *18*, 94-100.
